# Supplementary material
Source: bioRxiv or medRxiv preprint supplement (https://www.biorxiv.org/highwire/filestream/108602/field_highwire_adjunct_files/14/178806-22.pdf)

## **Supplementary Figure 22**

Each of the subsequent pages shows a GWAS Manhattan plot (left) and QQ-plot (right) for the 8 different body confound measures.

Systolic Blood Pressure

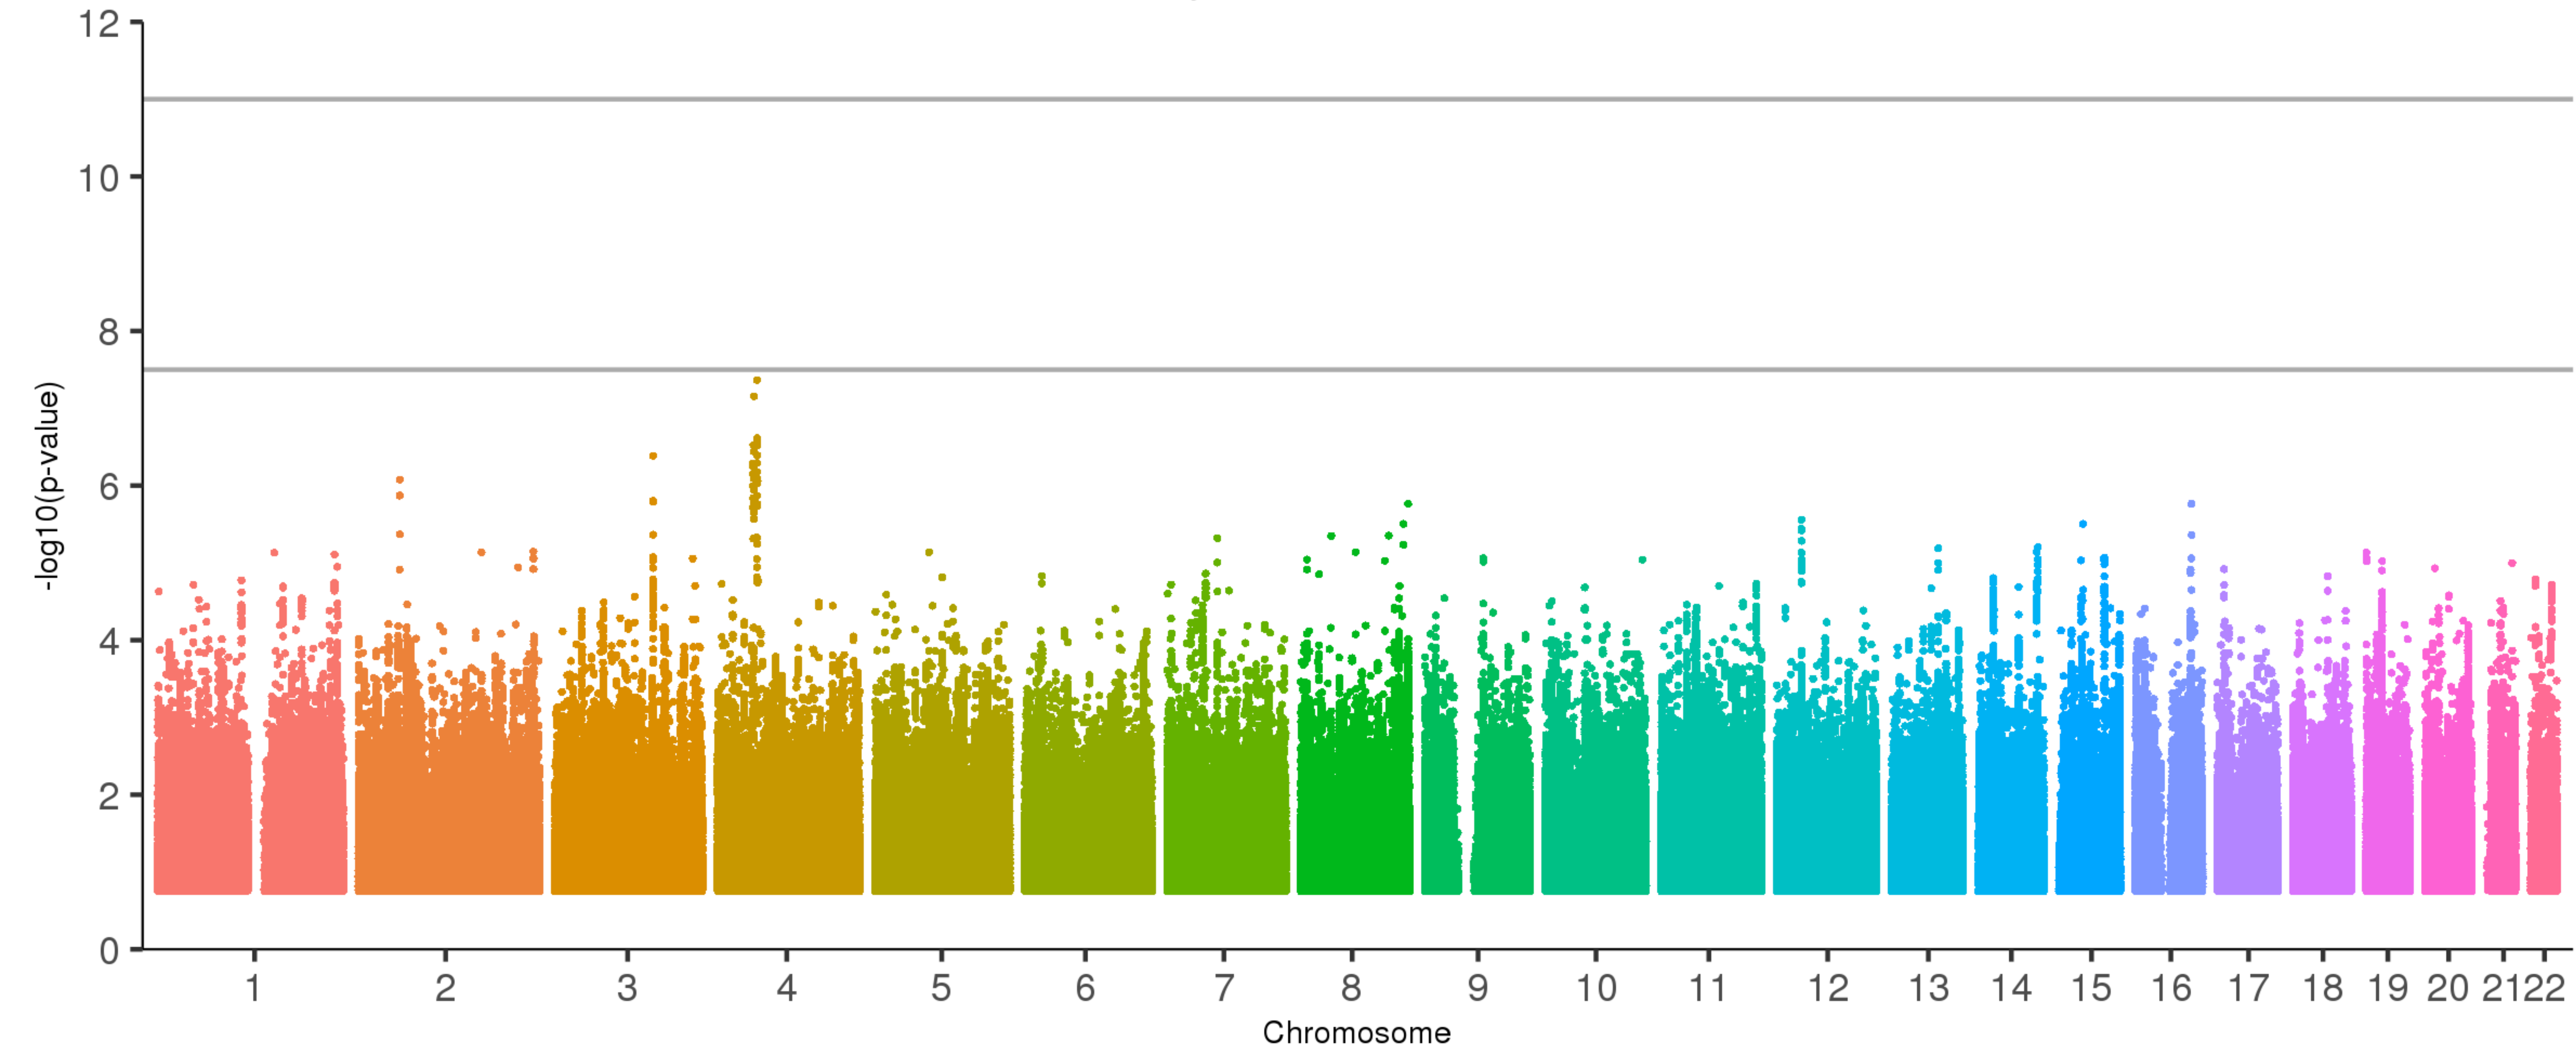

Systolic Blood Pressure

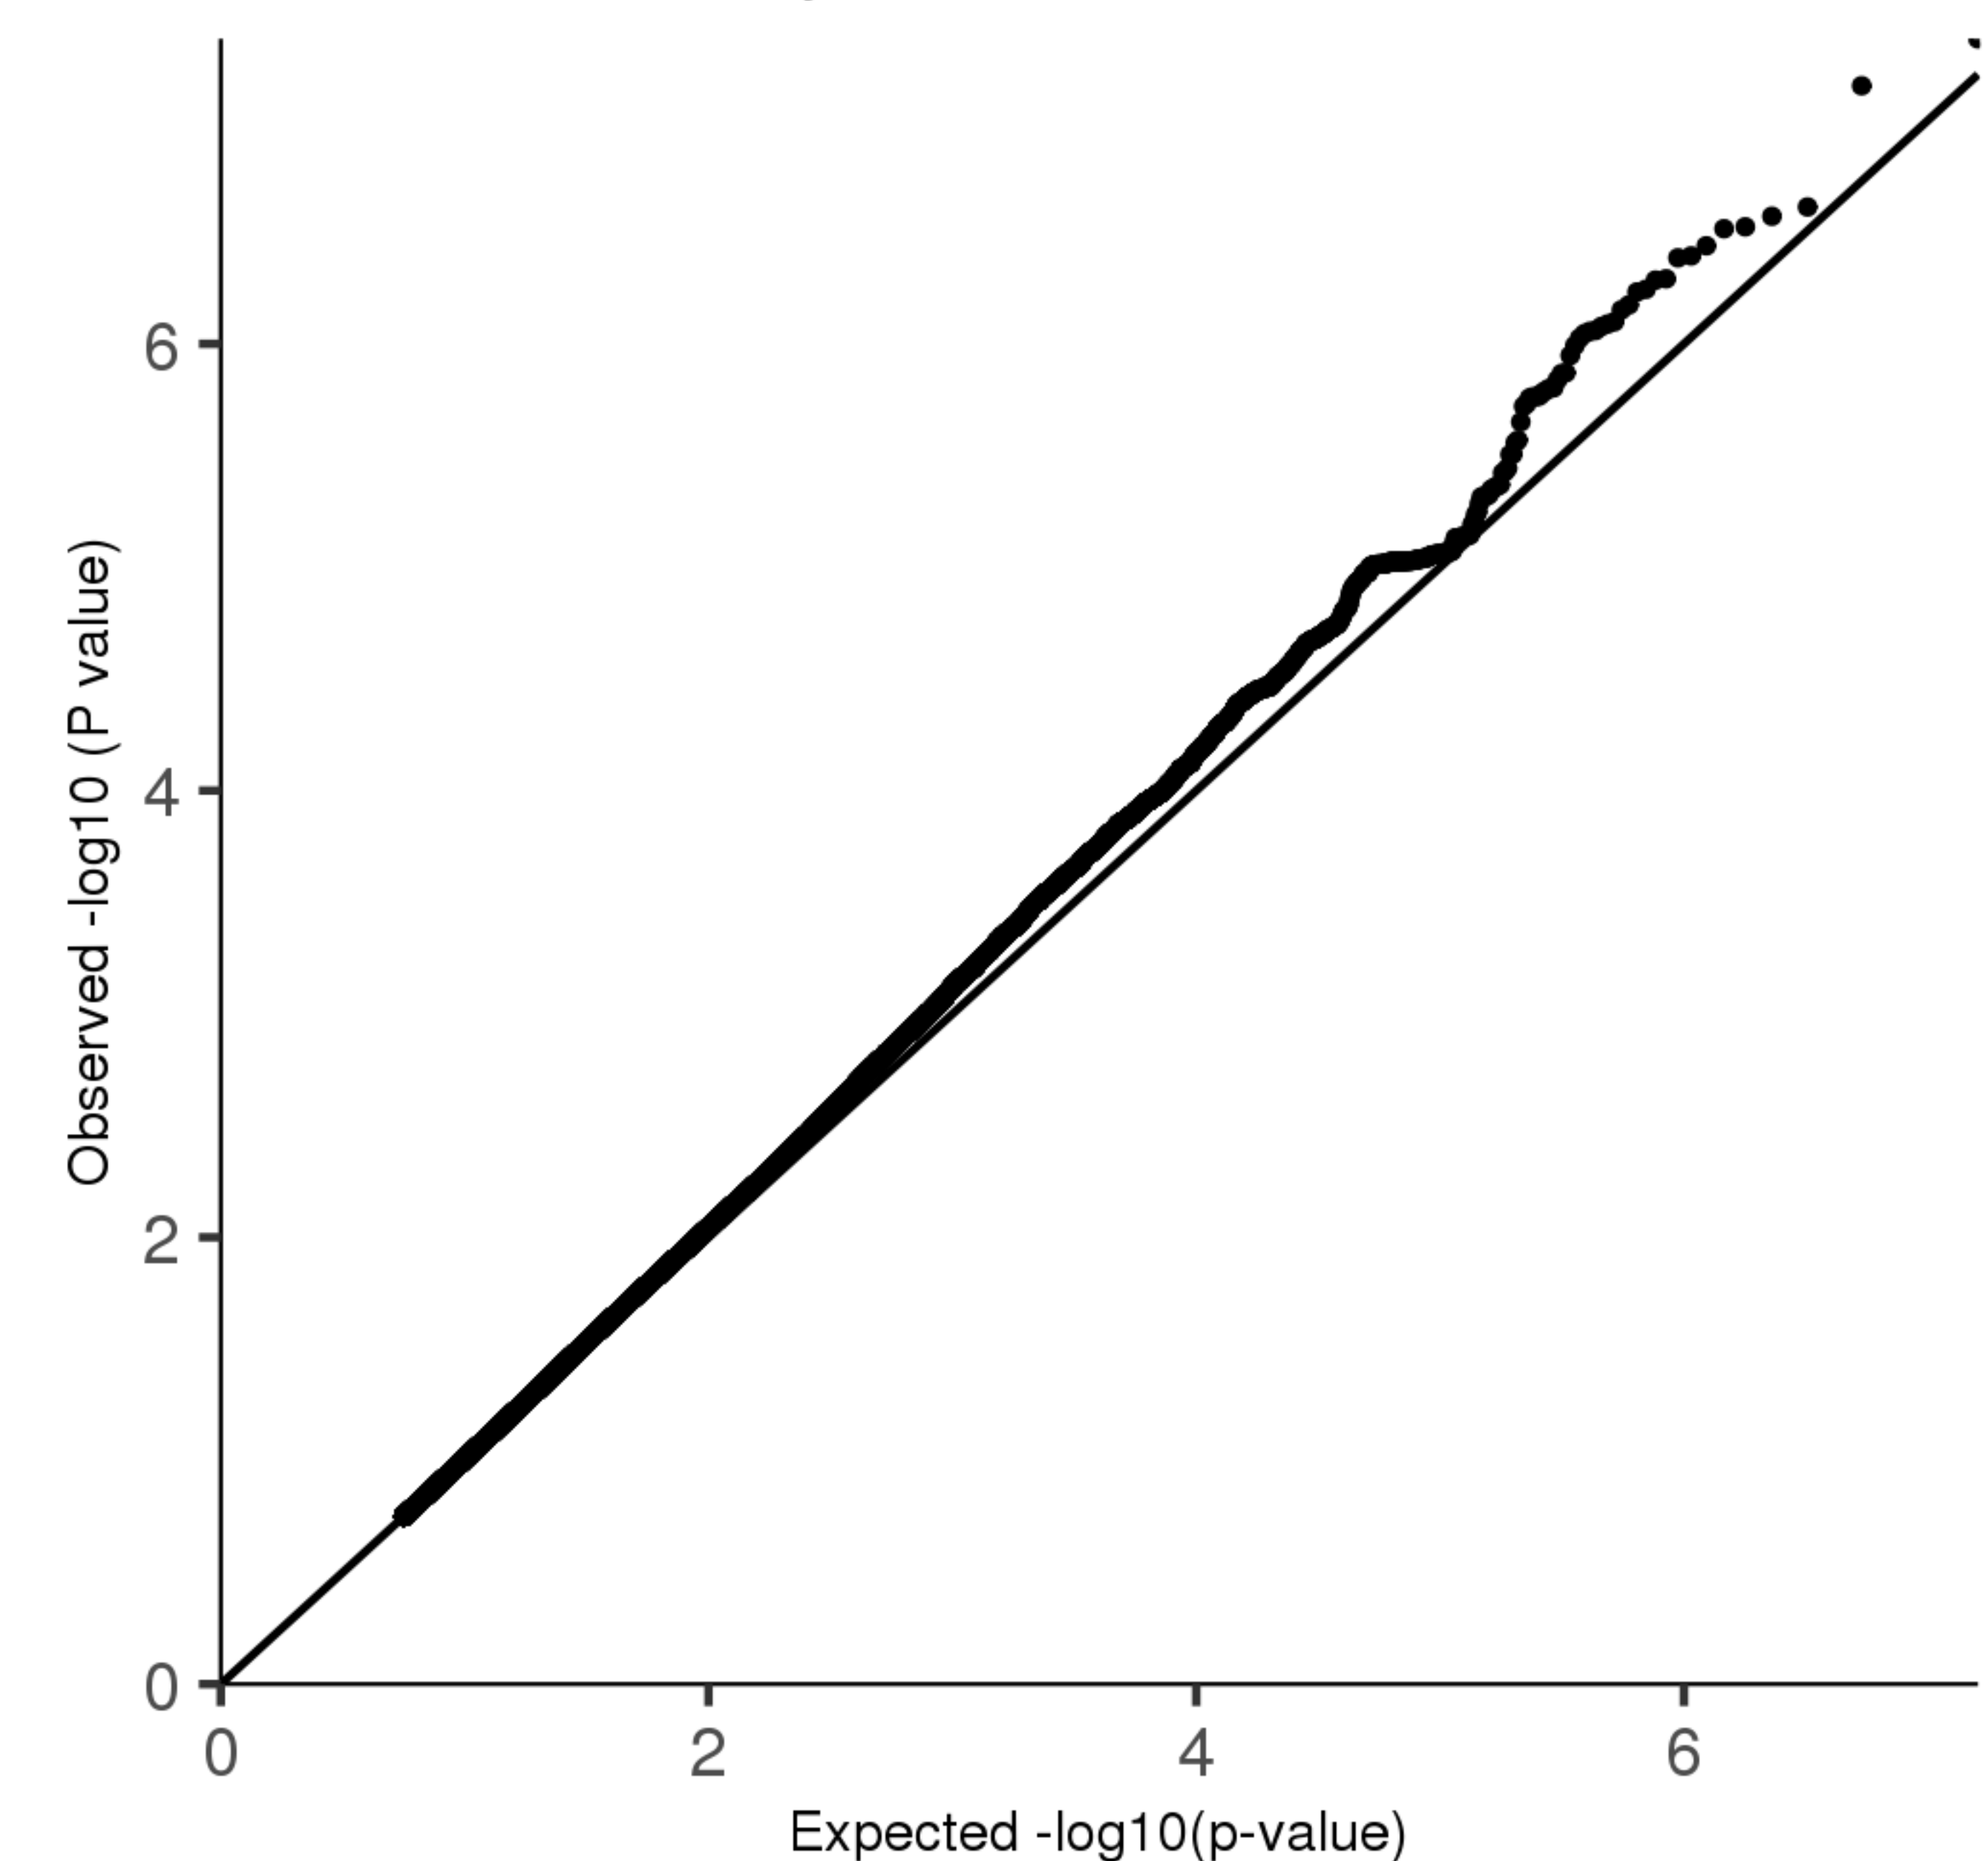

Height

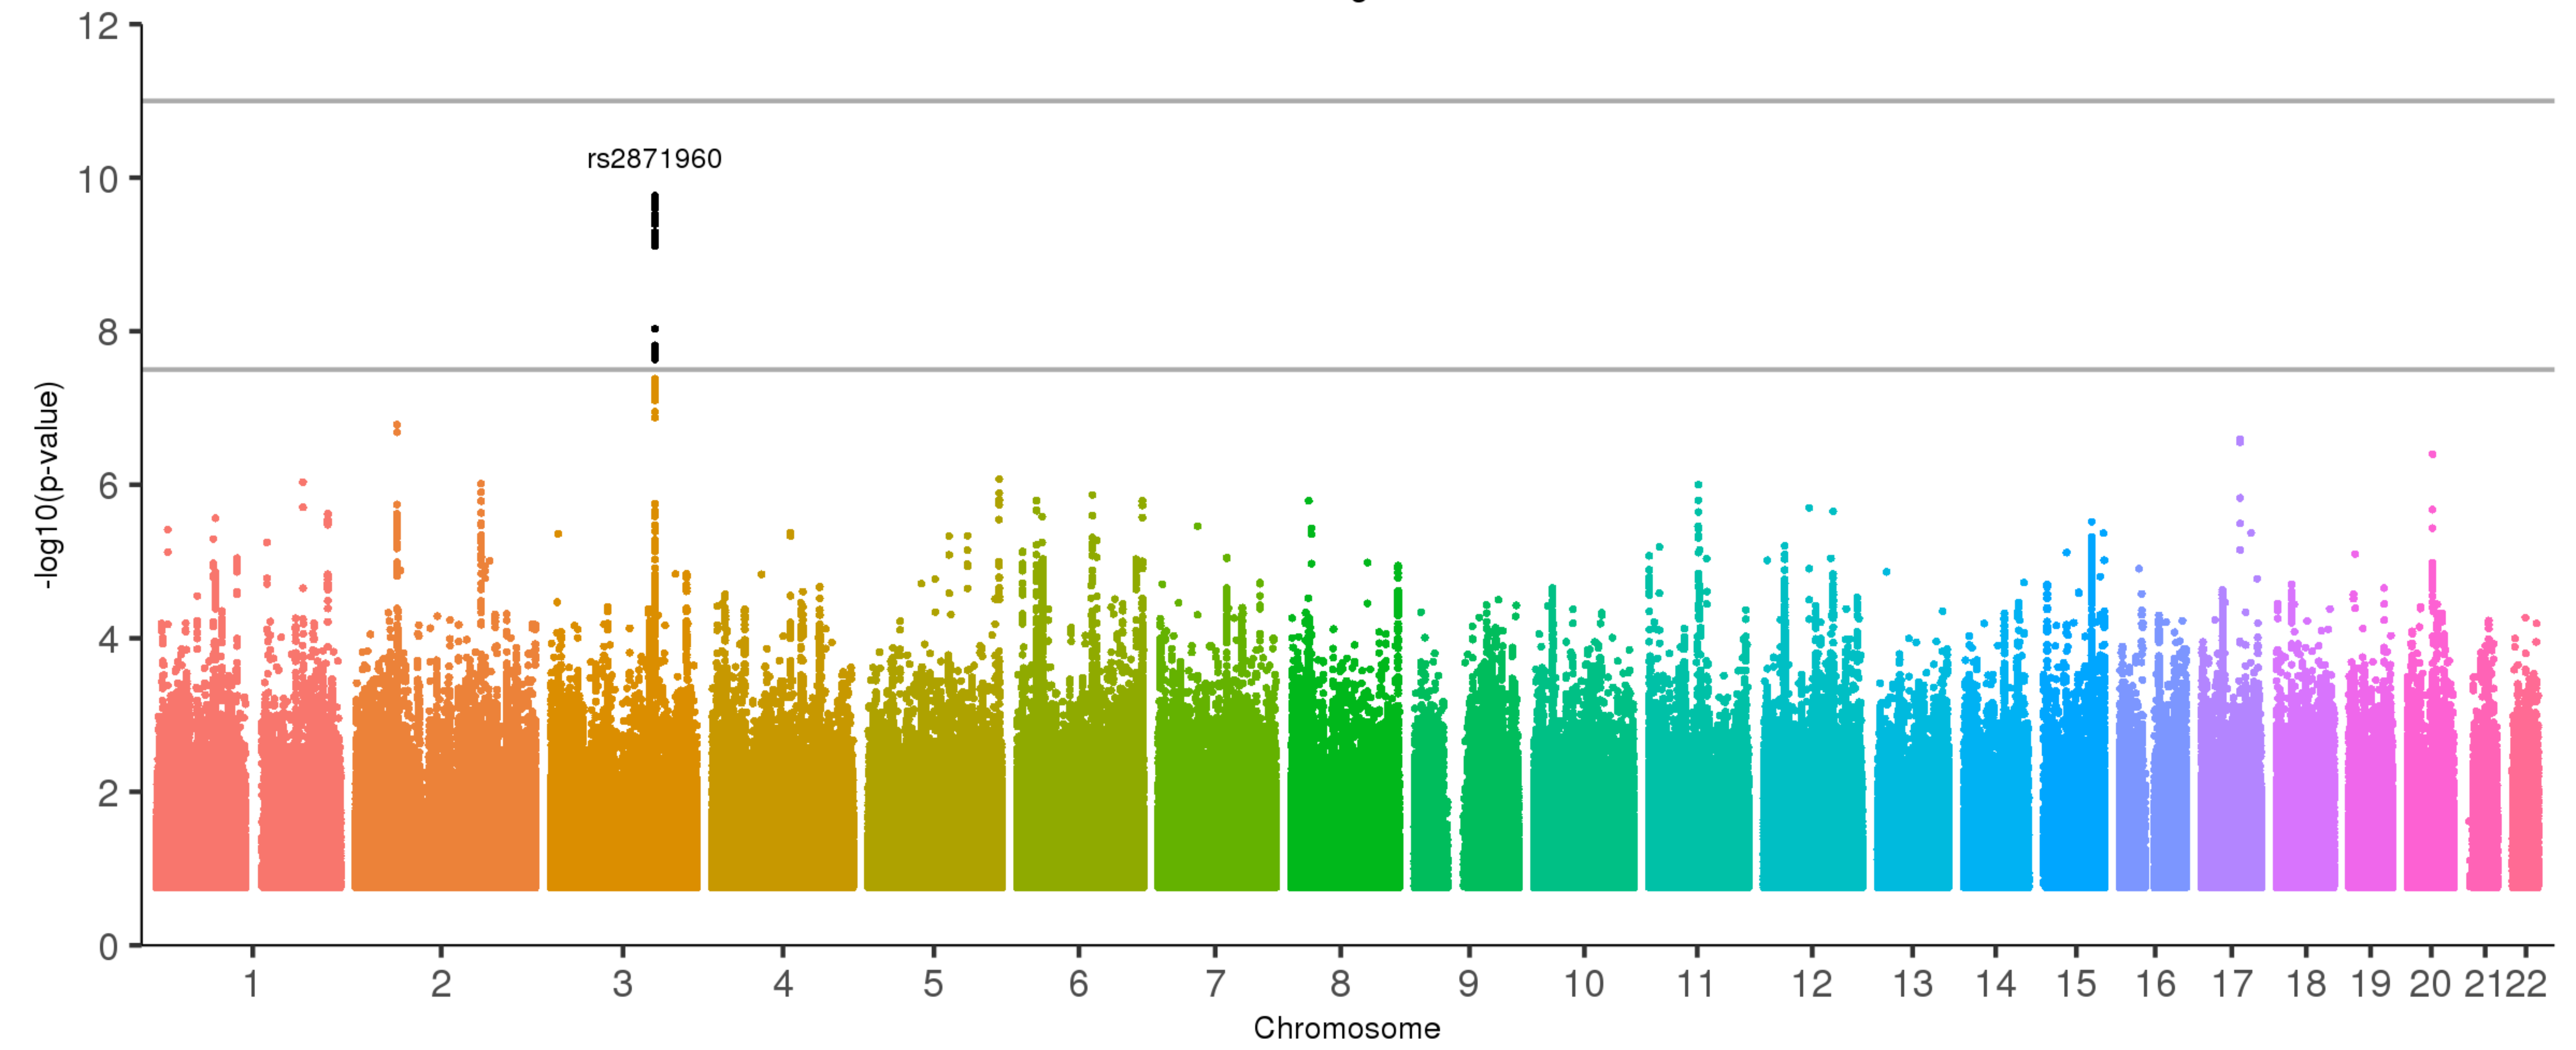

Height

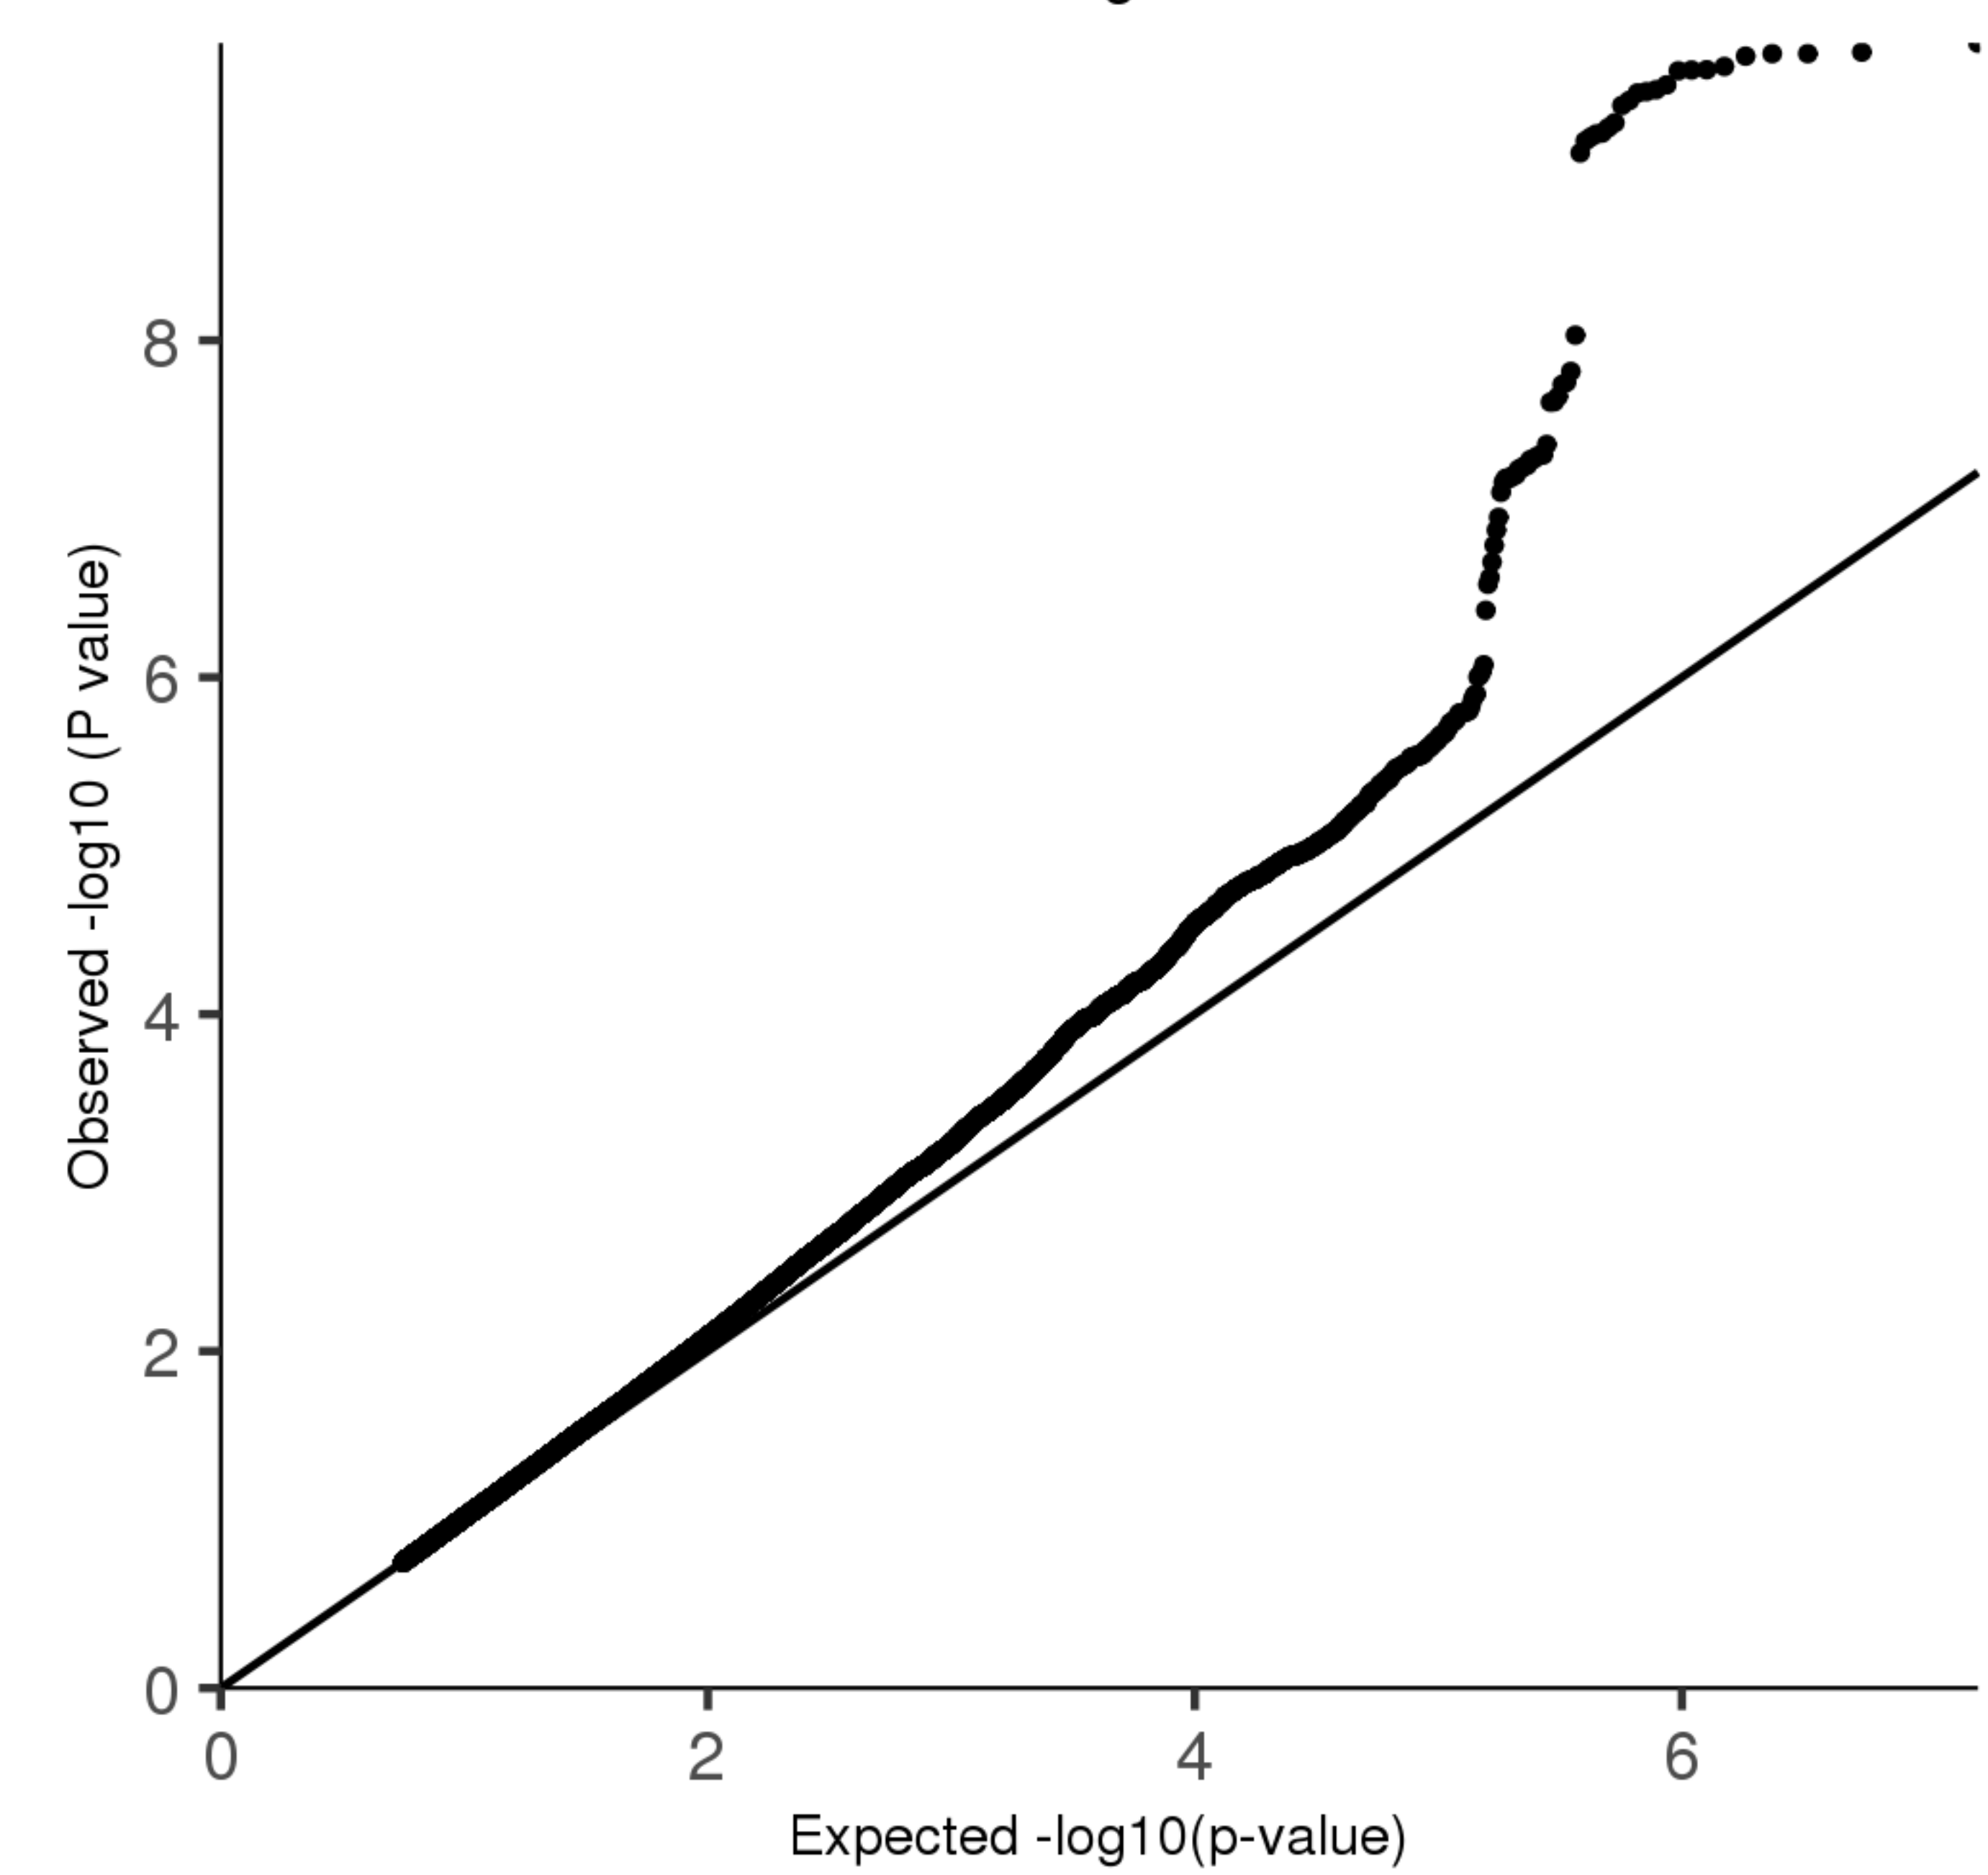

Weight

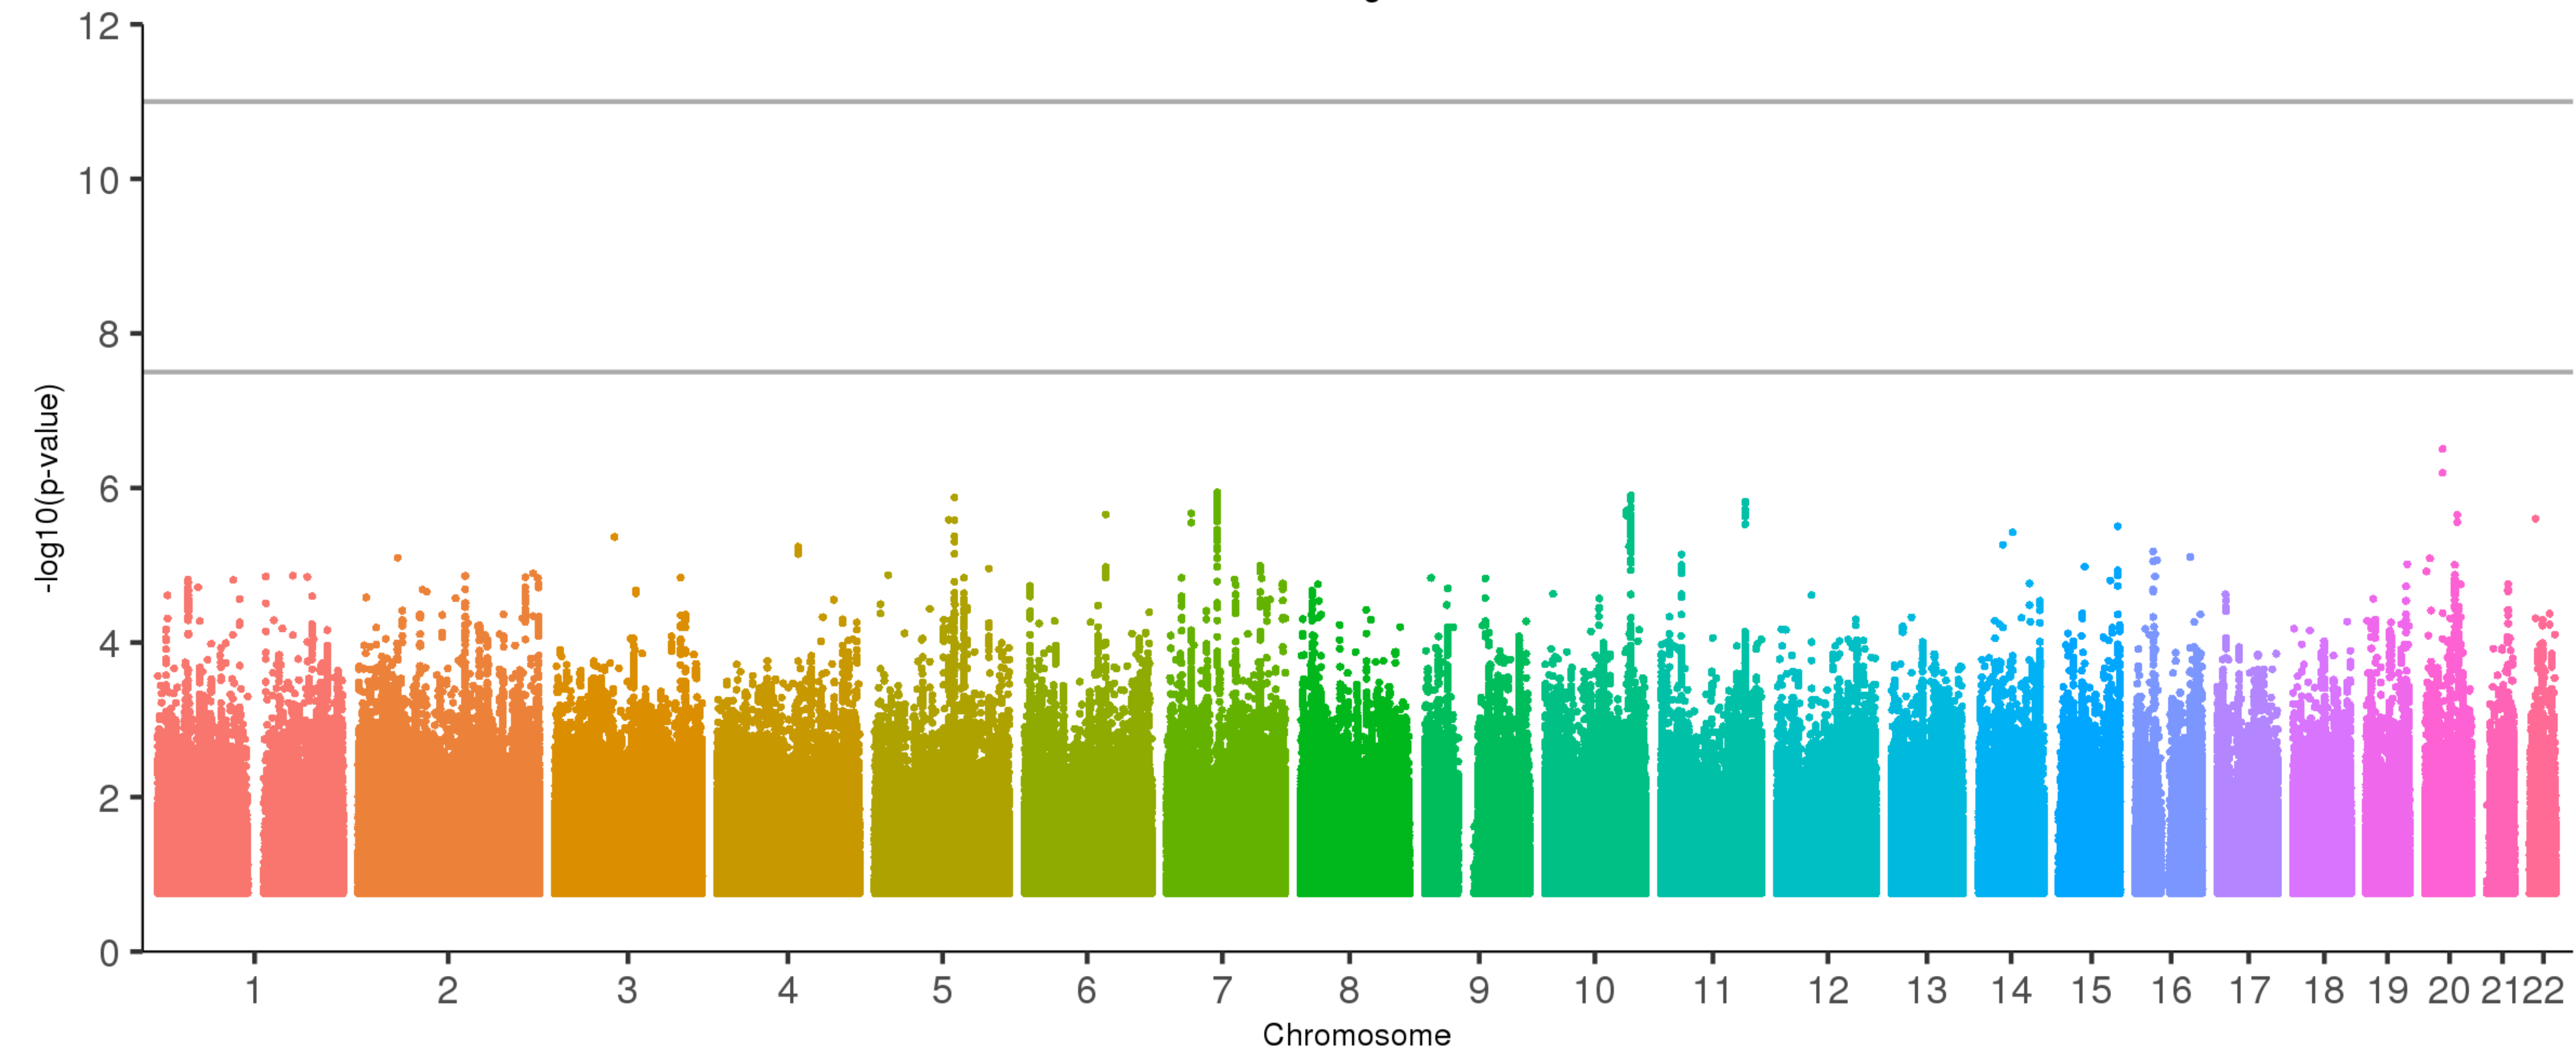

Weight

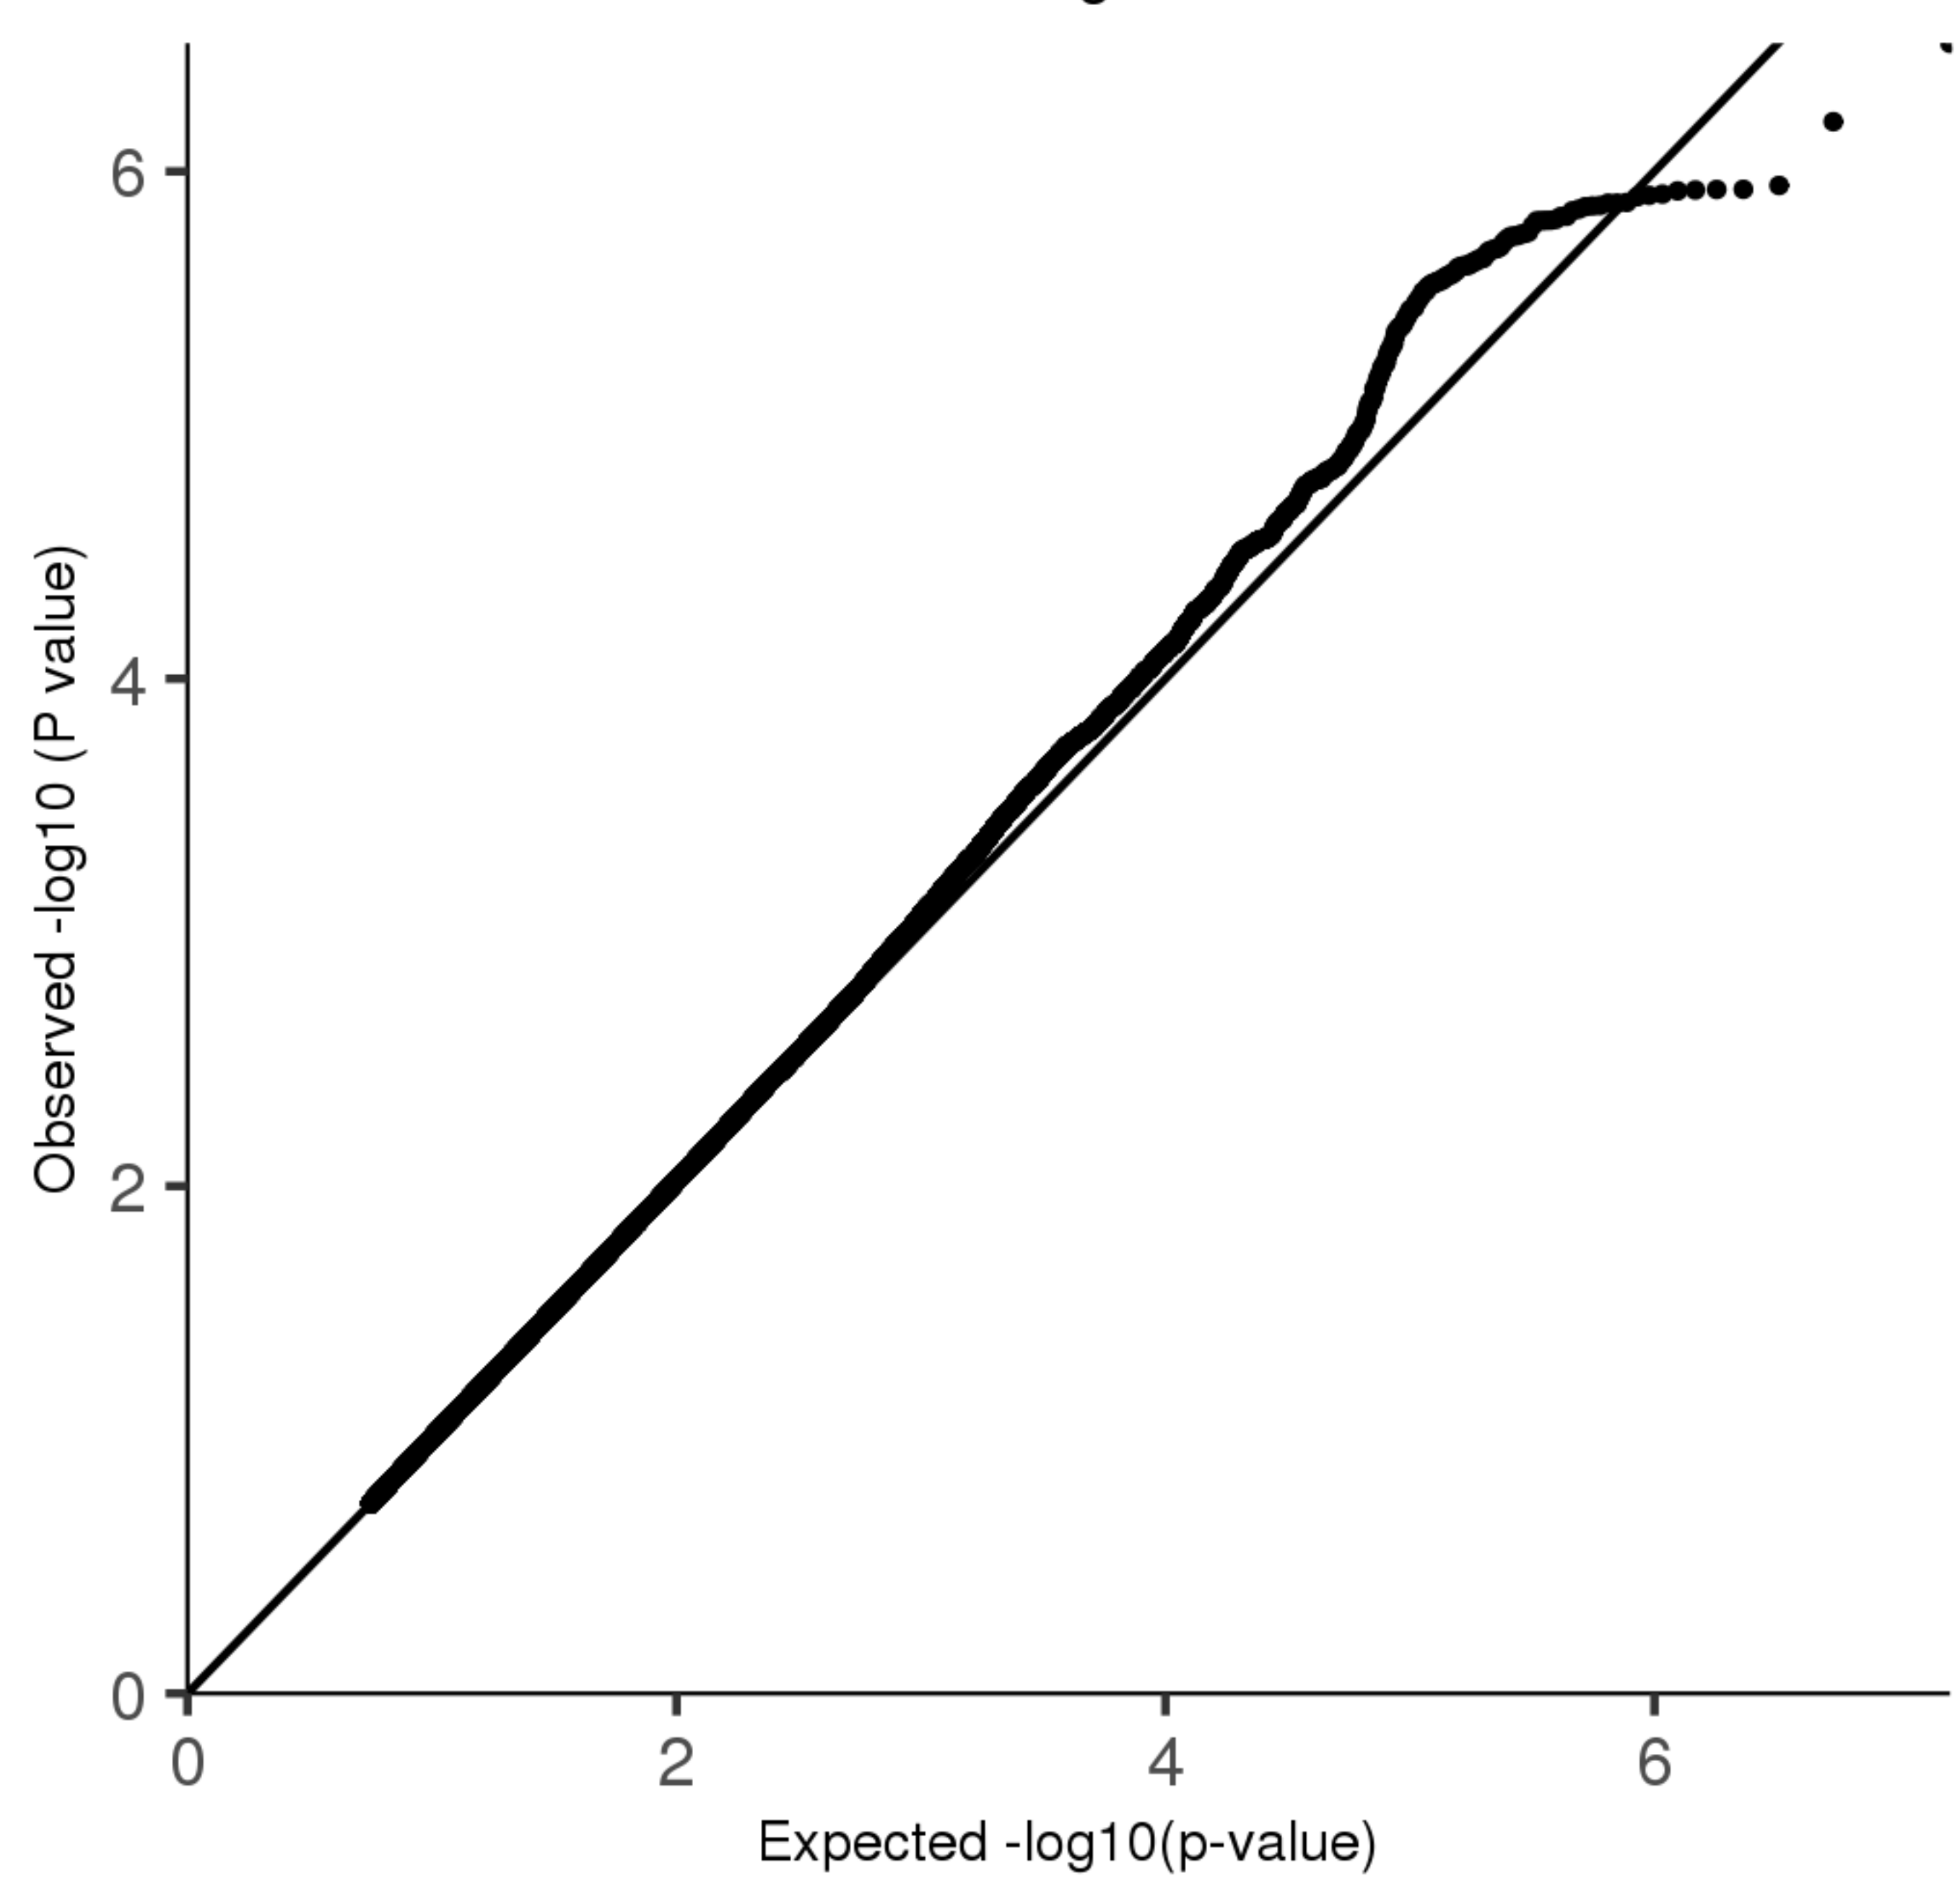



HeadBMC

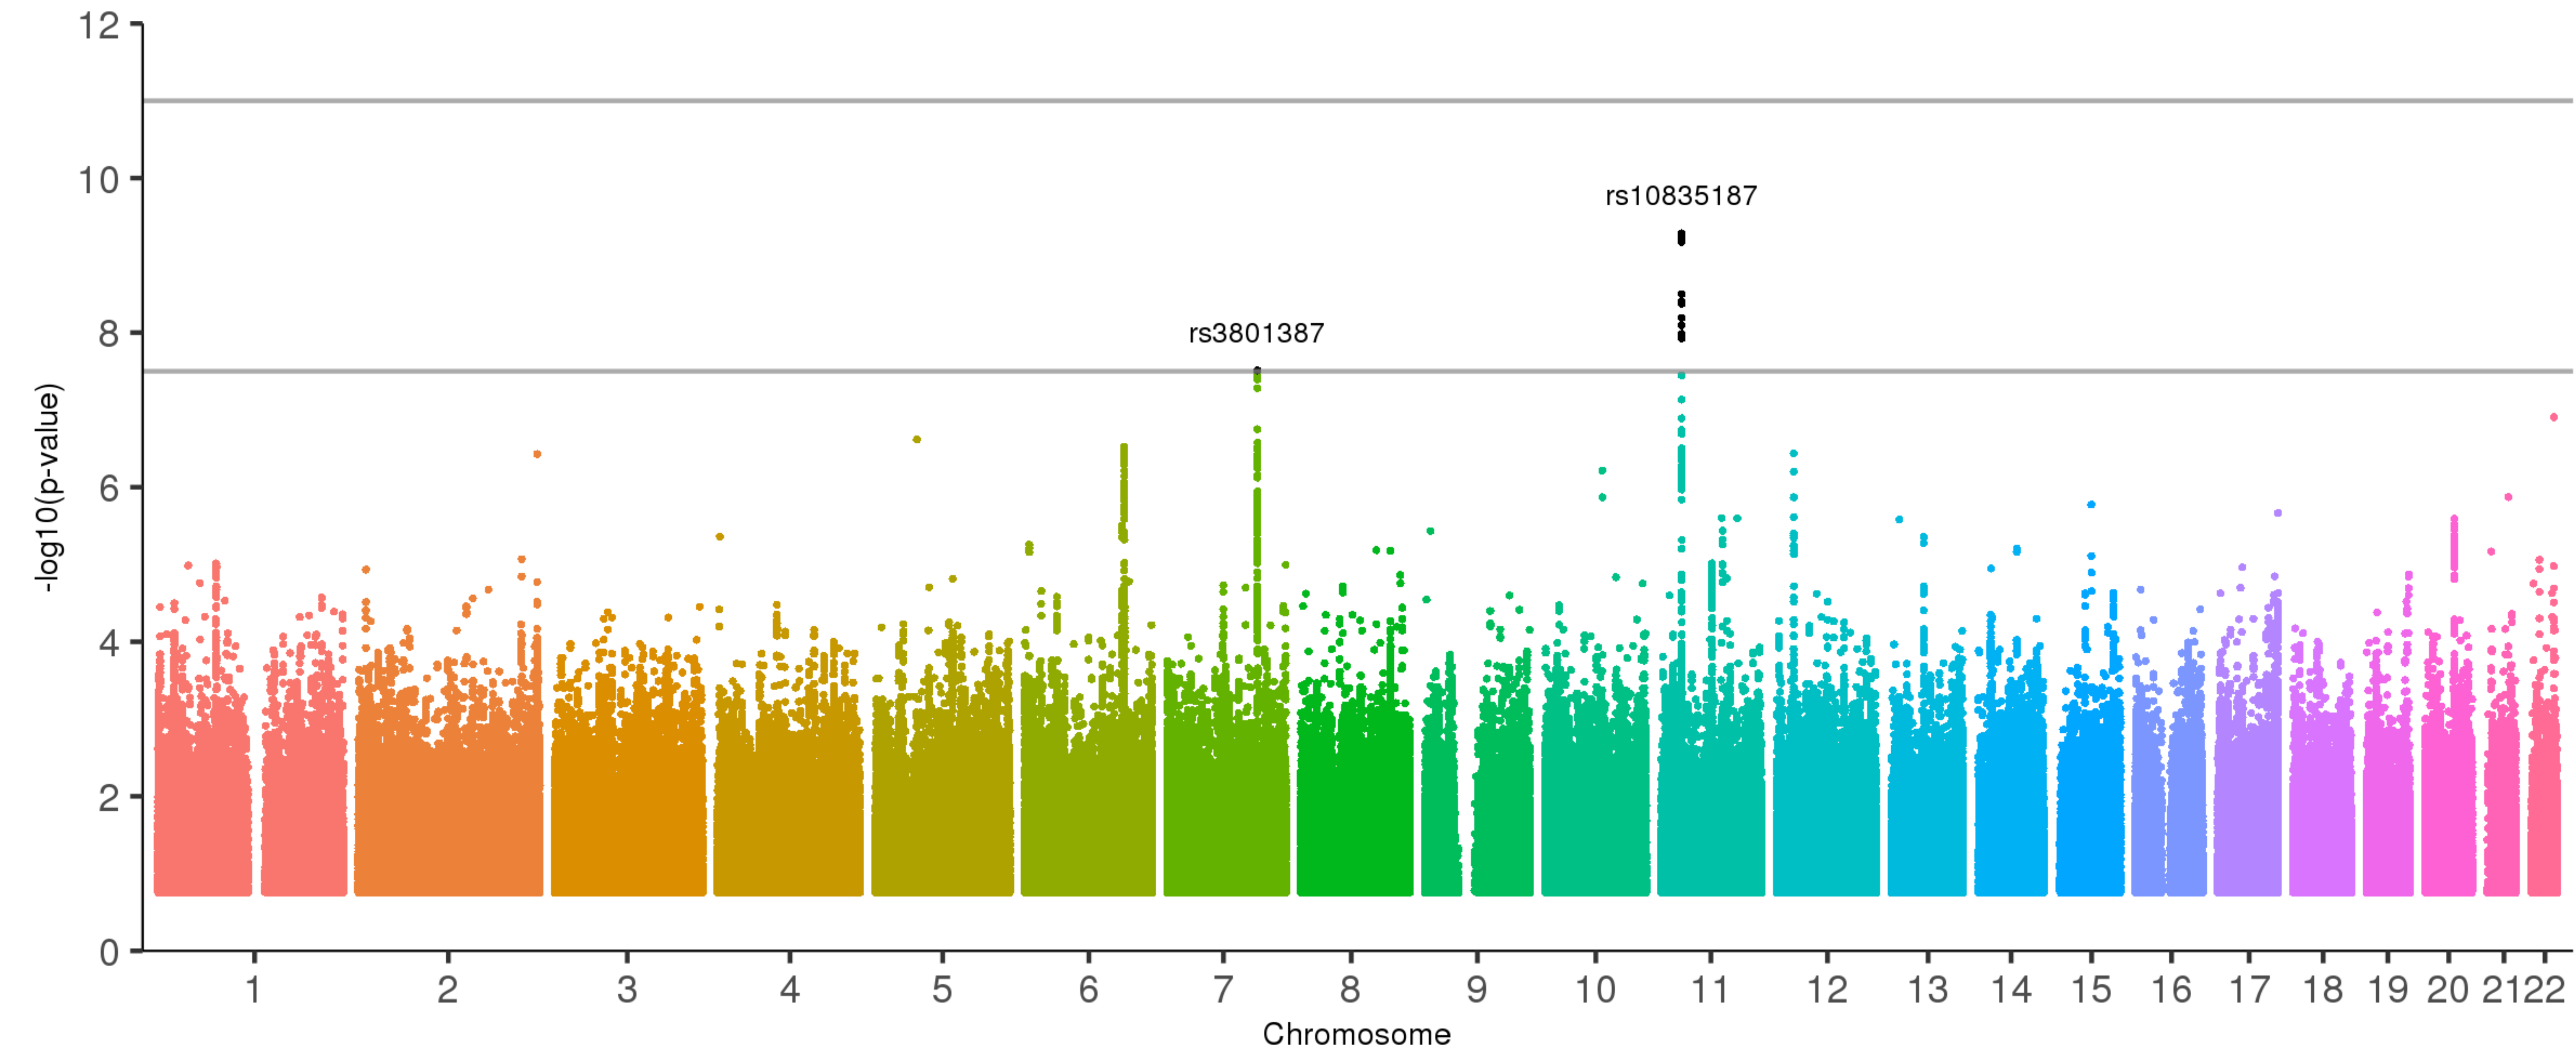

HeadBMC

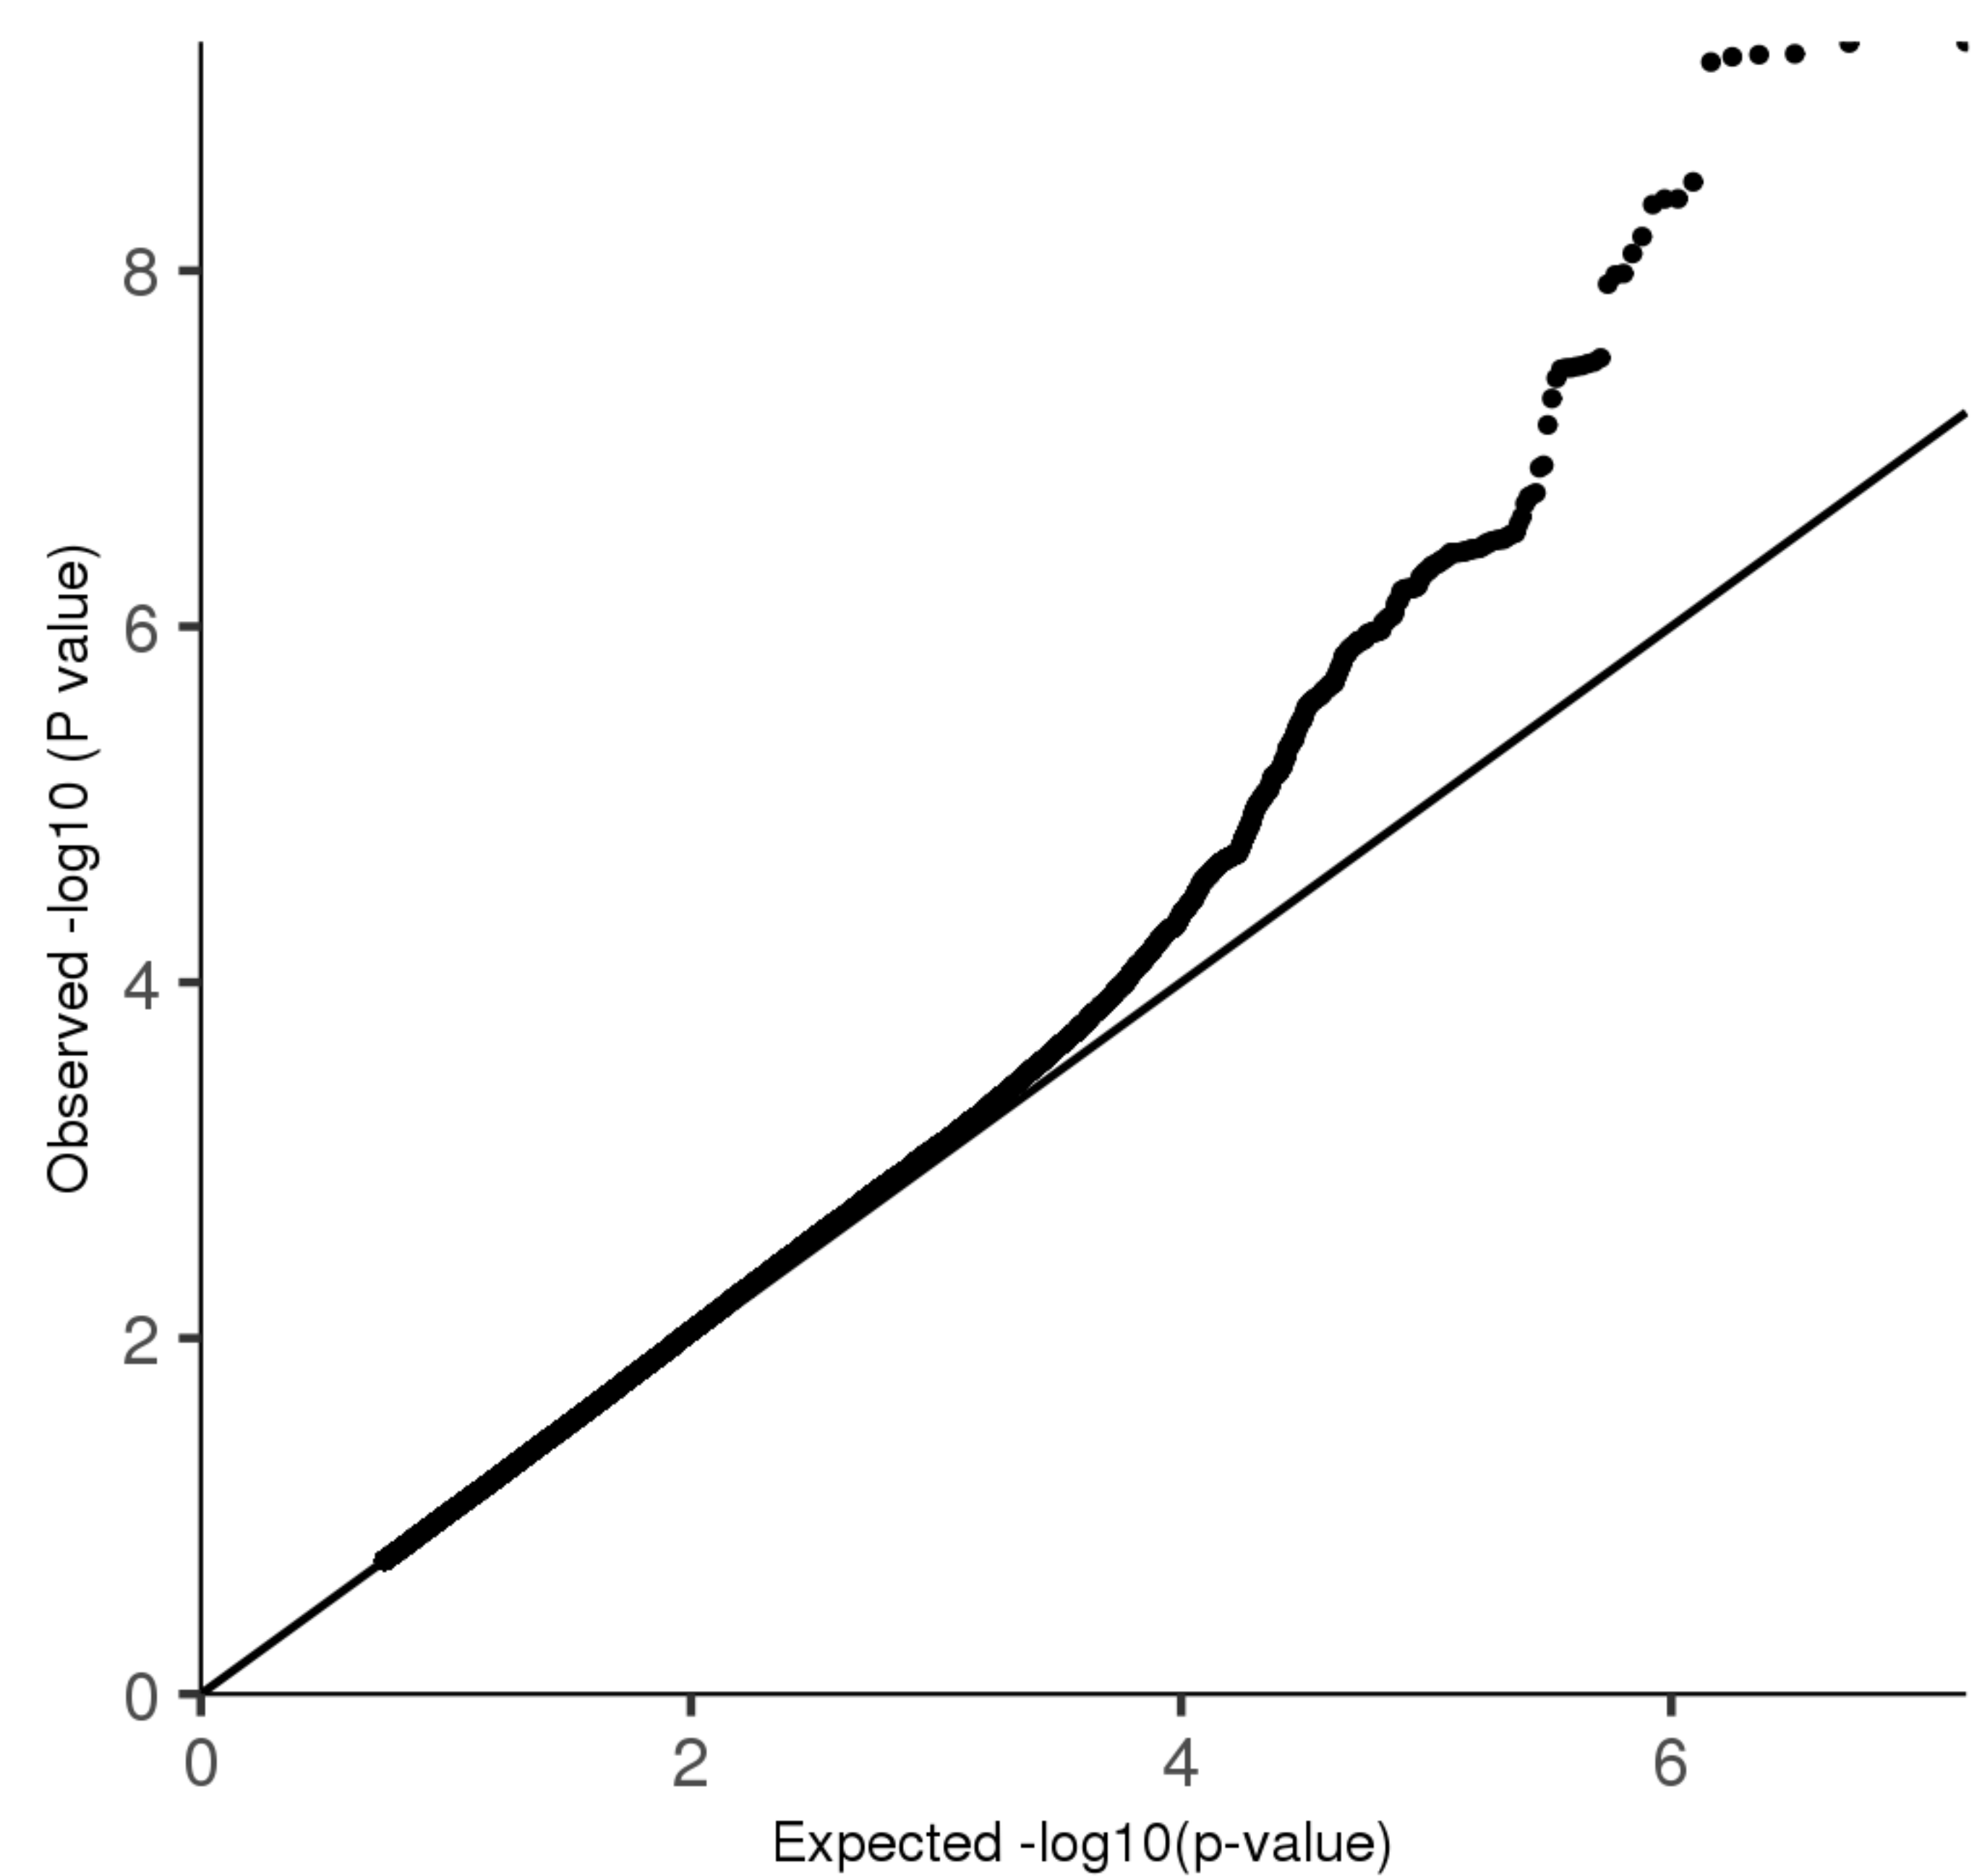

HeadBMD

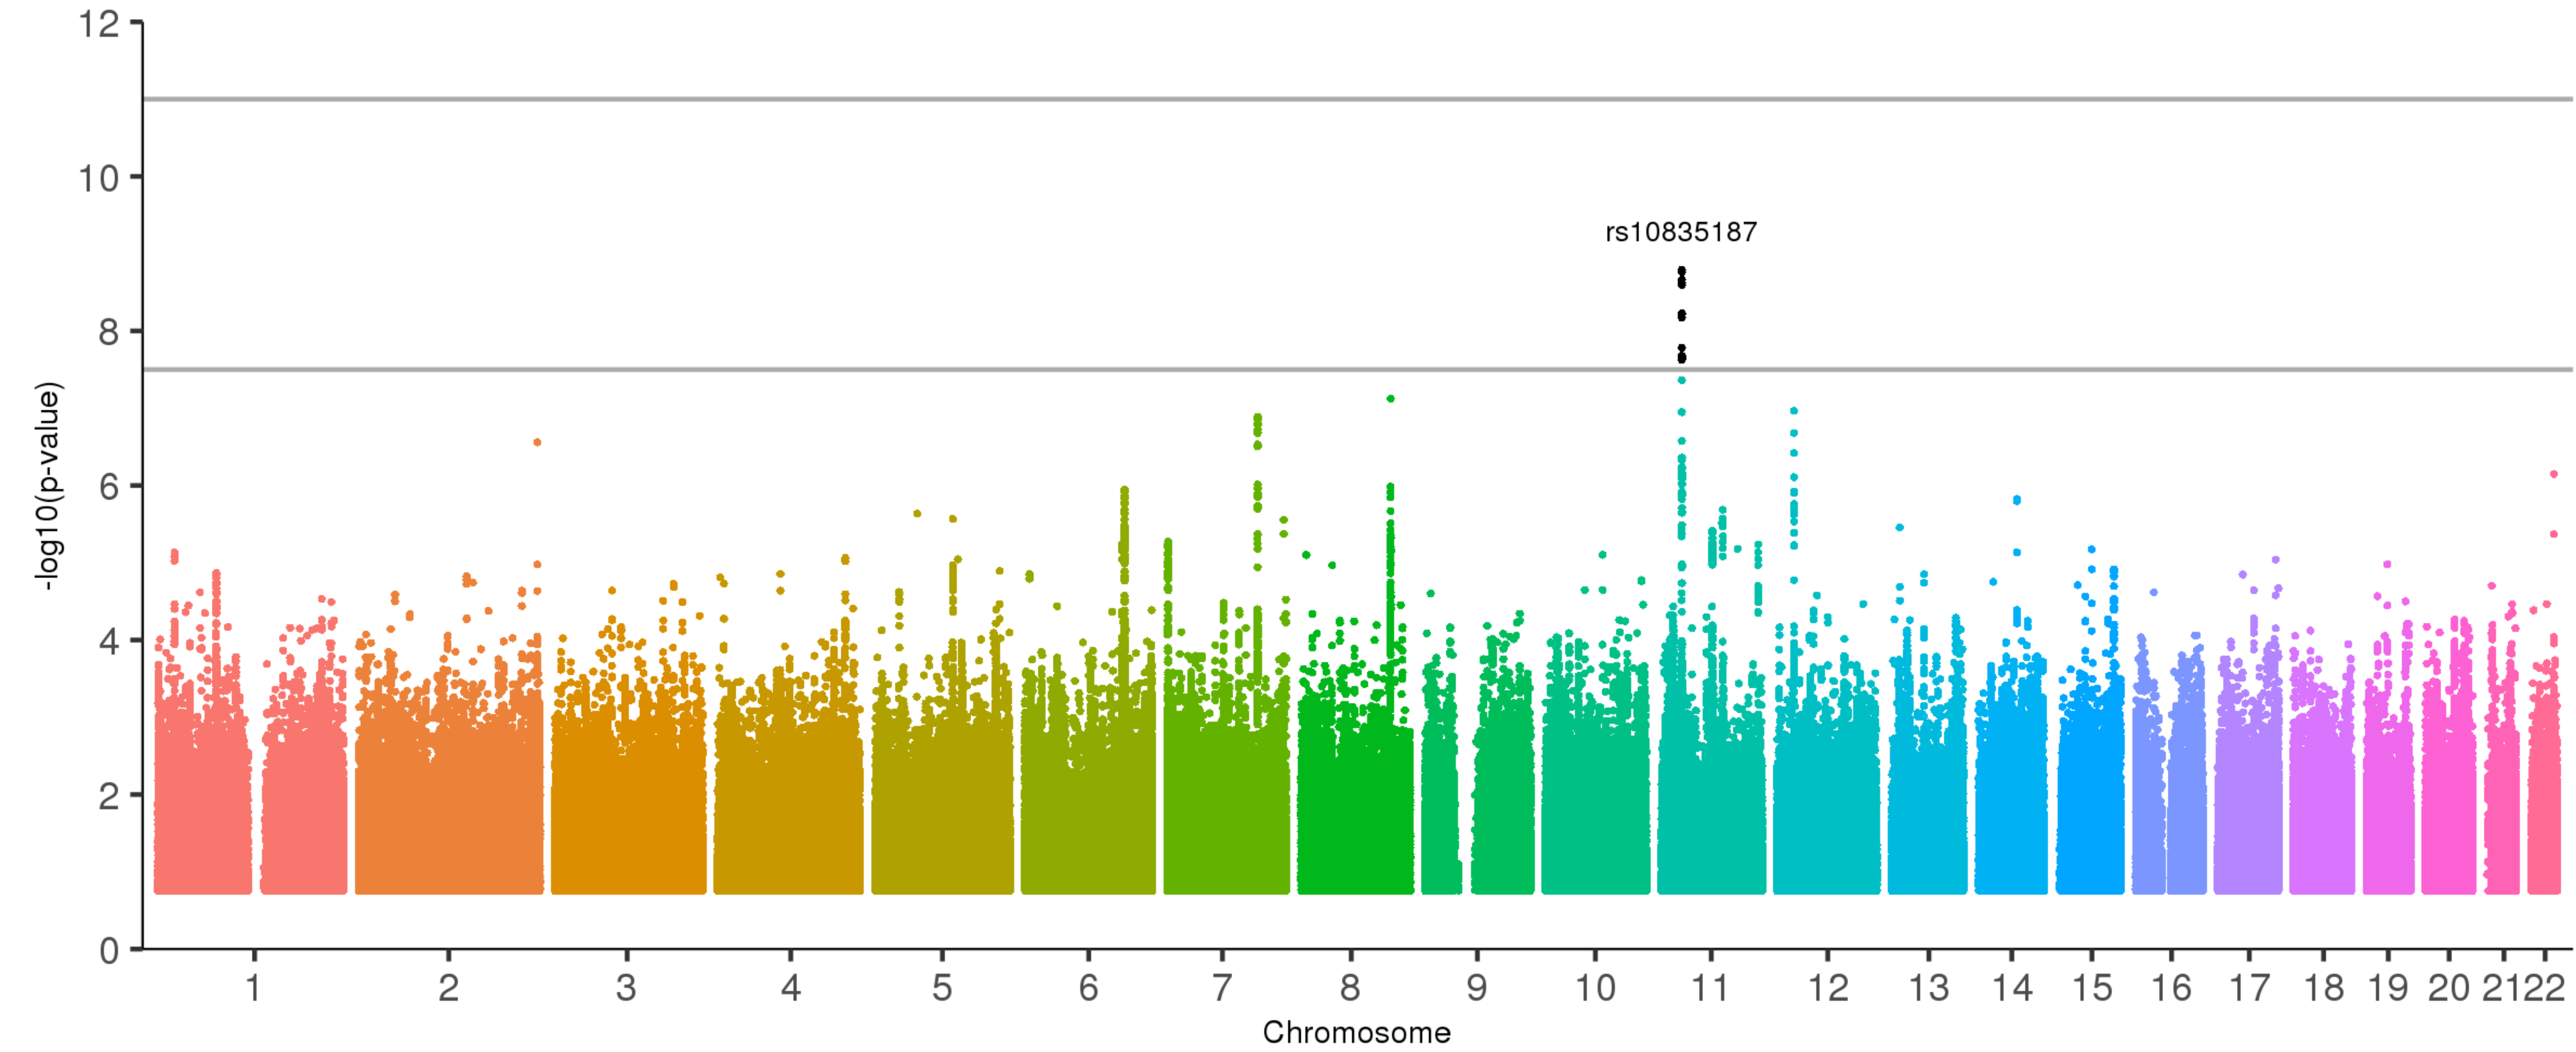

HeadBMD

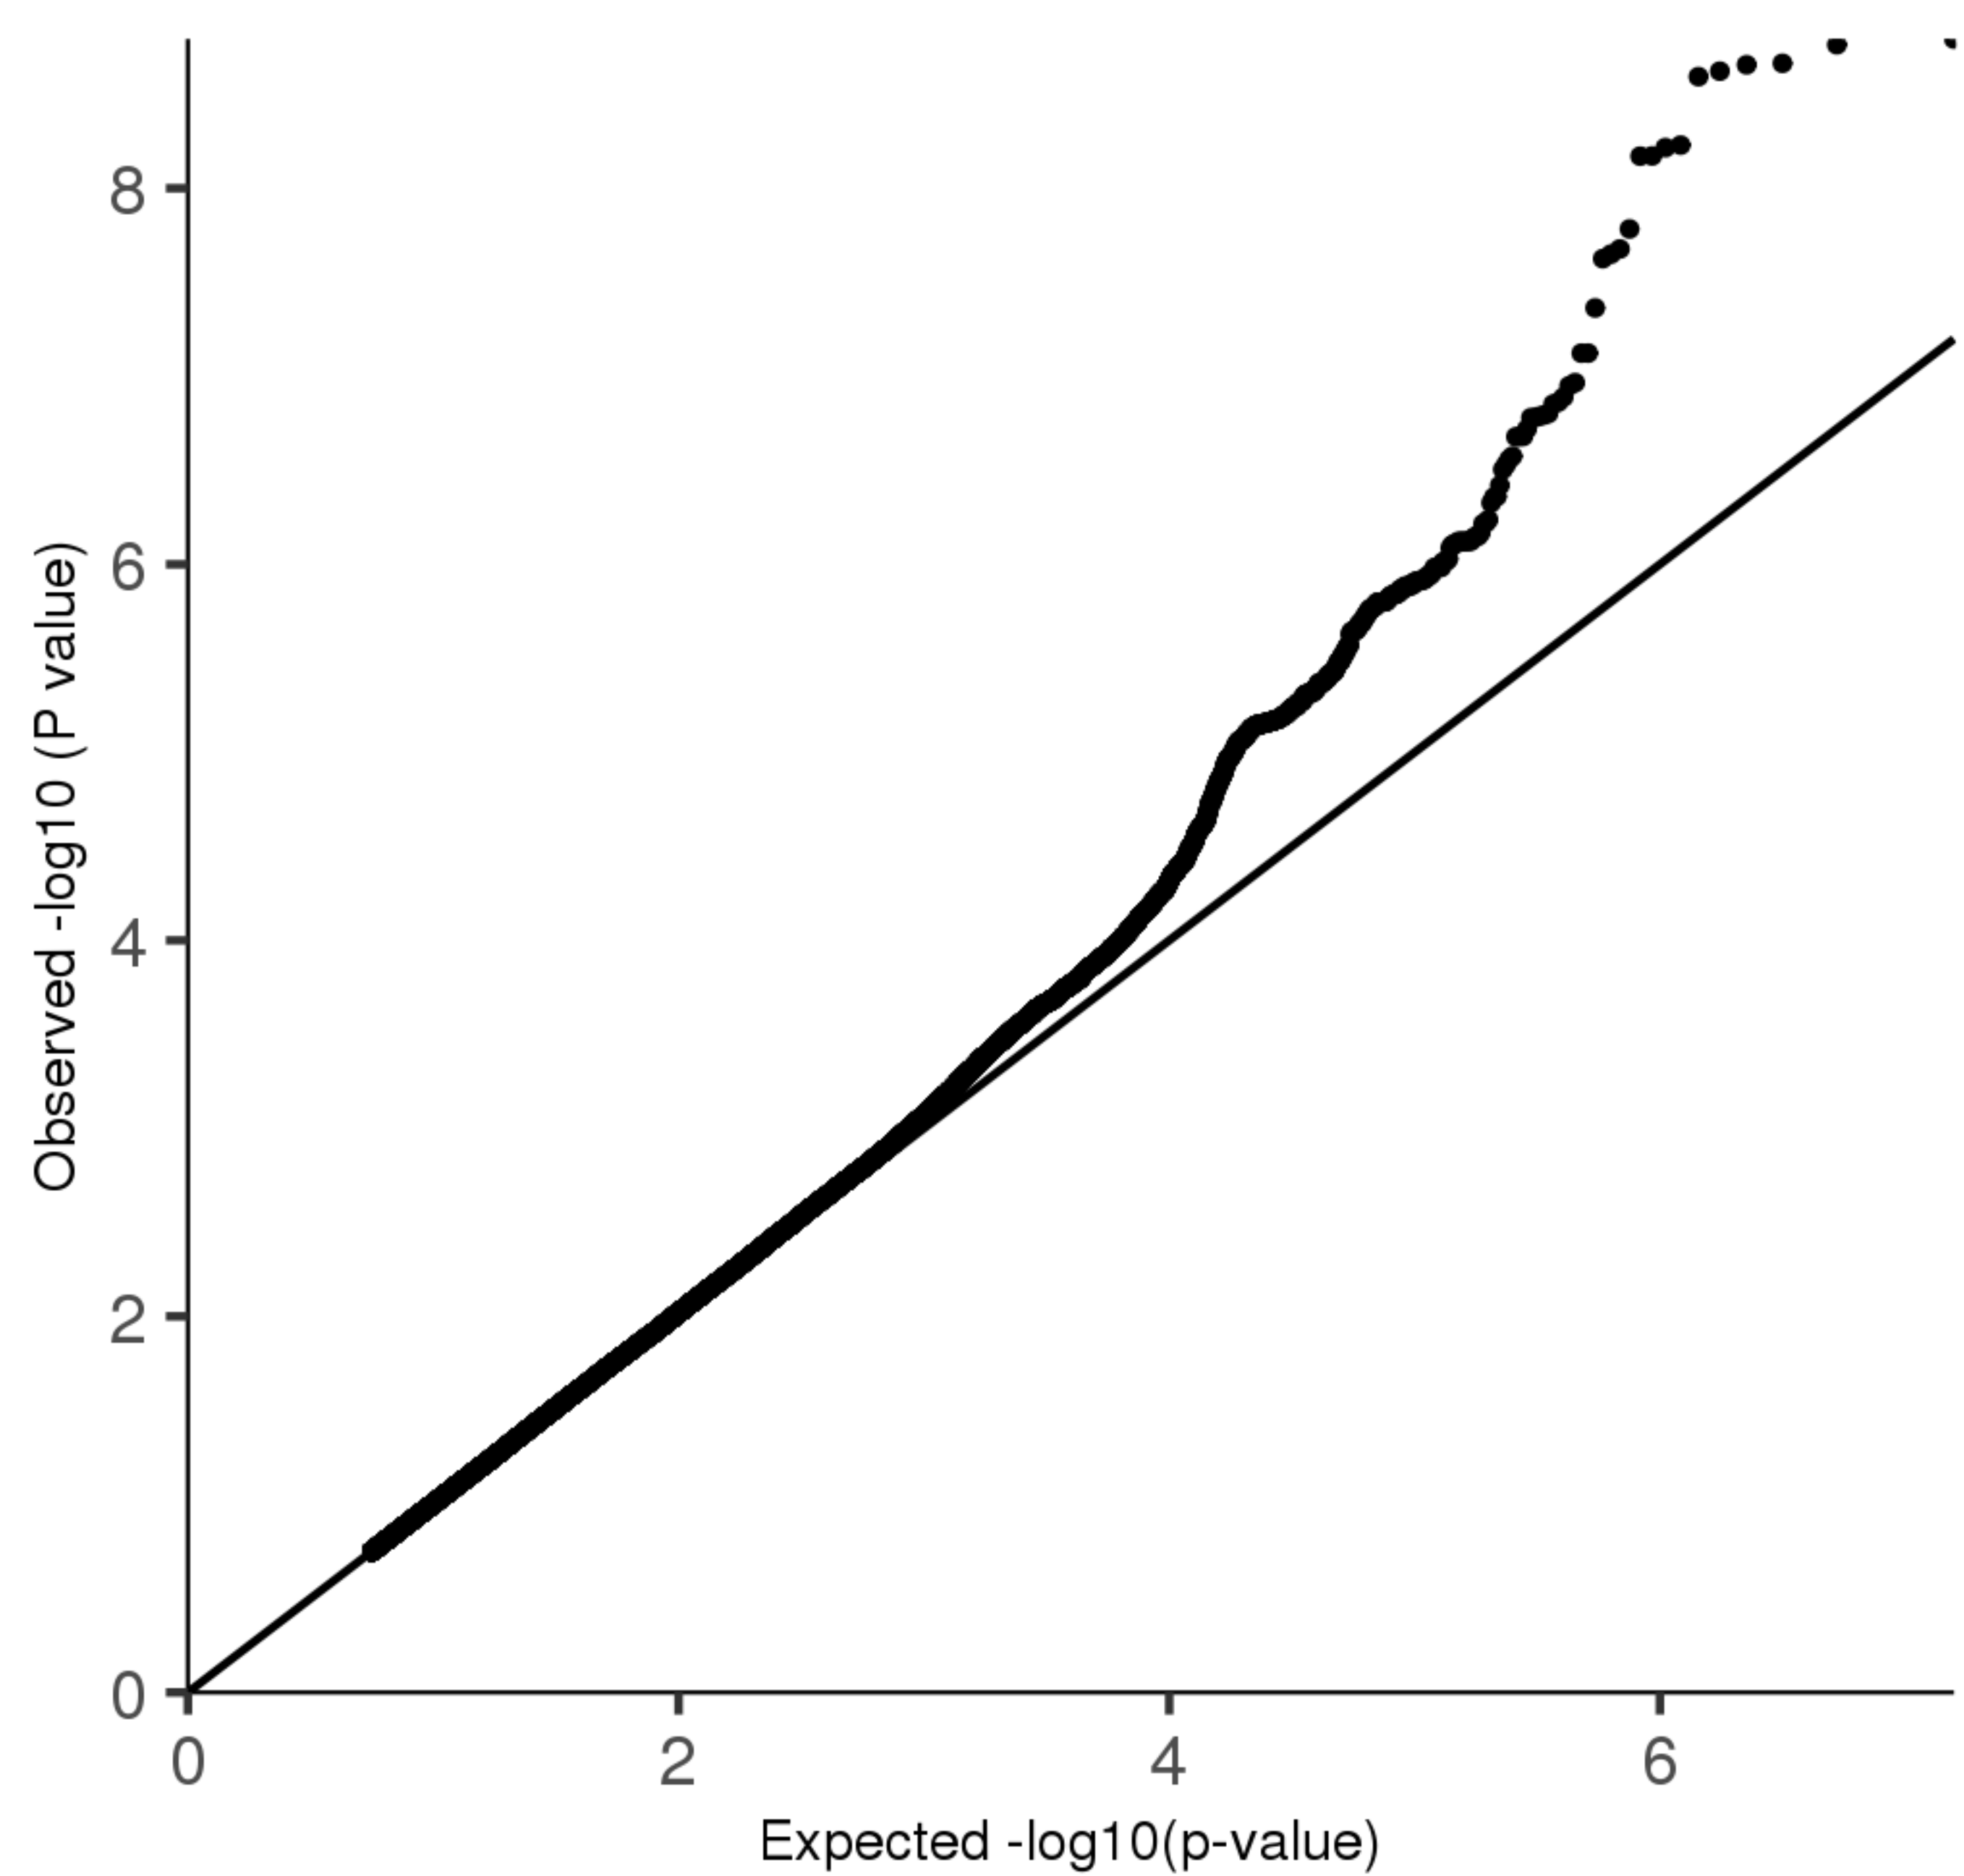

First Bone PC

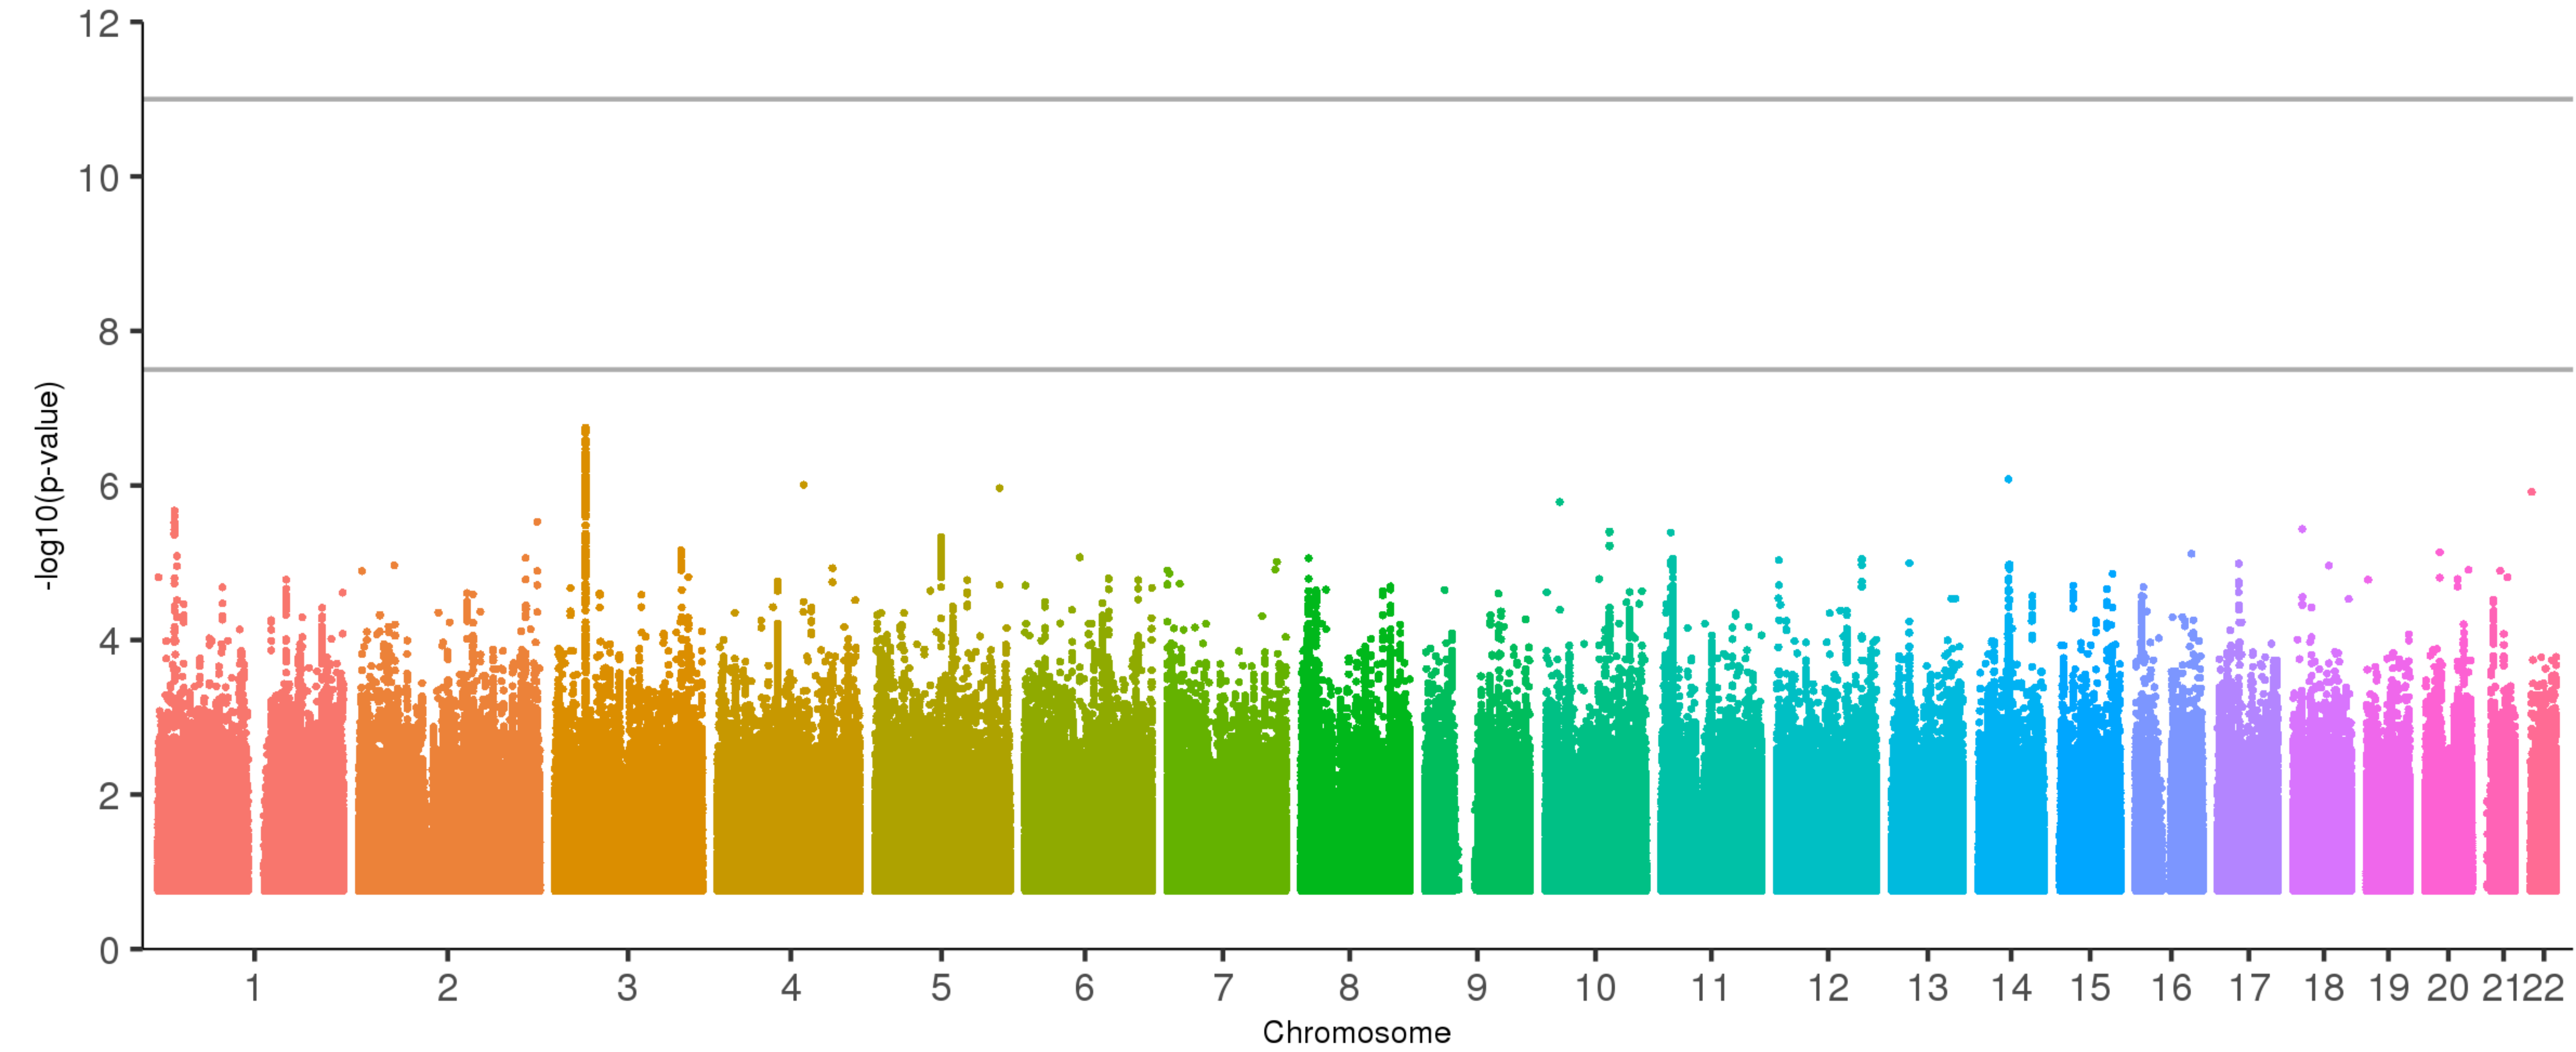

First Bone PC

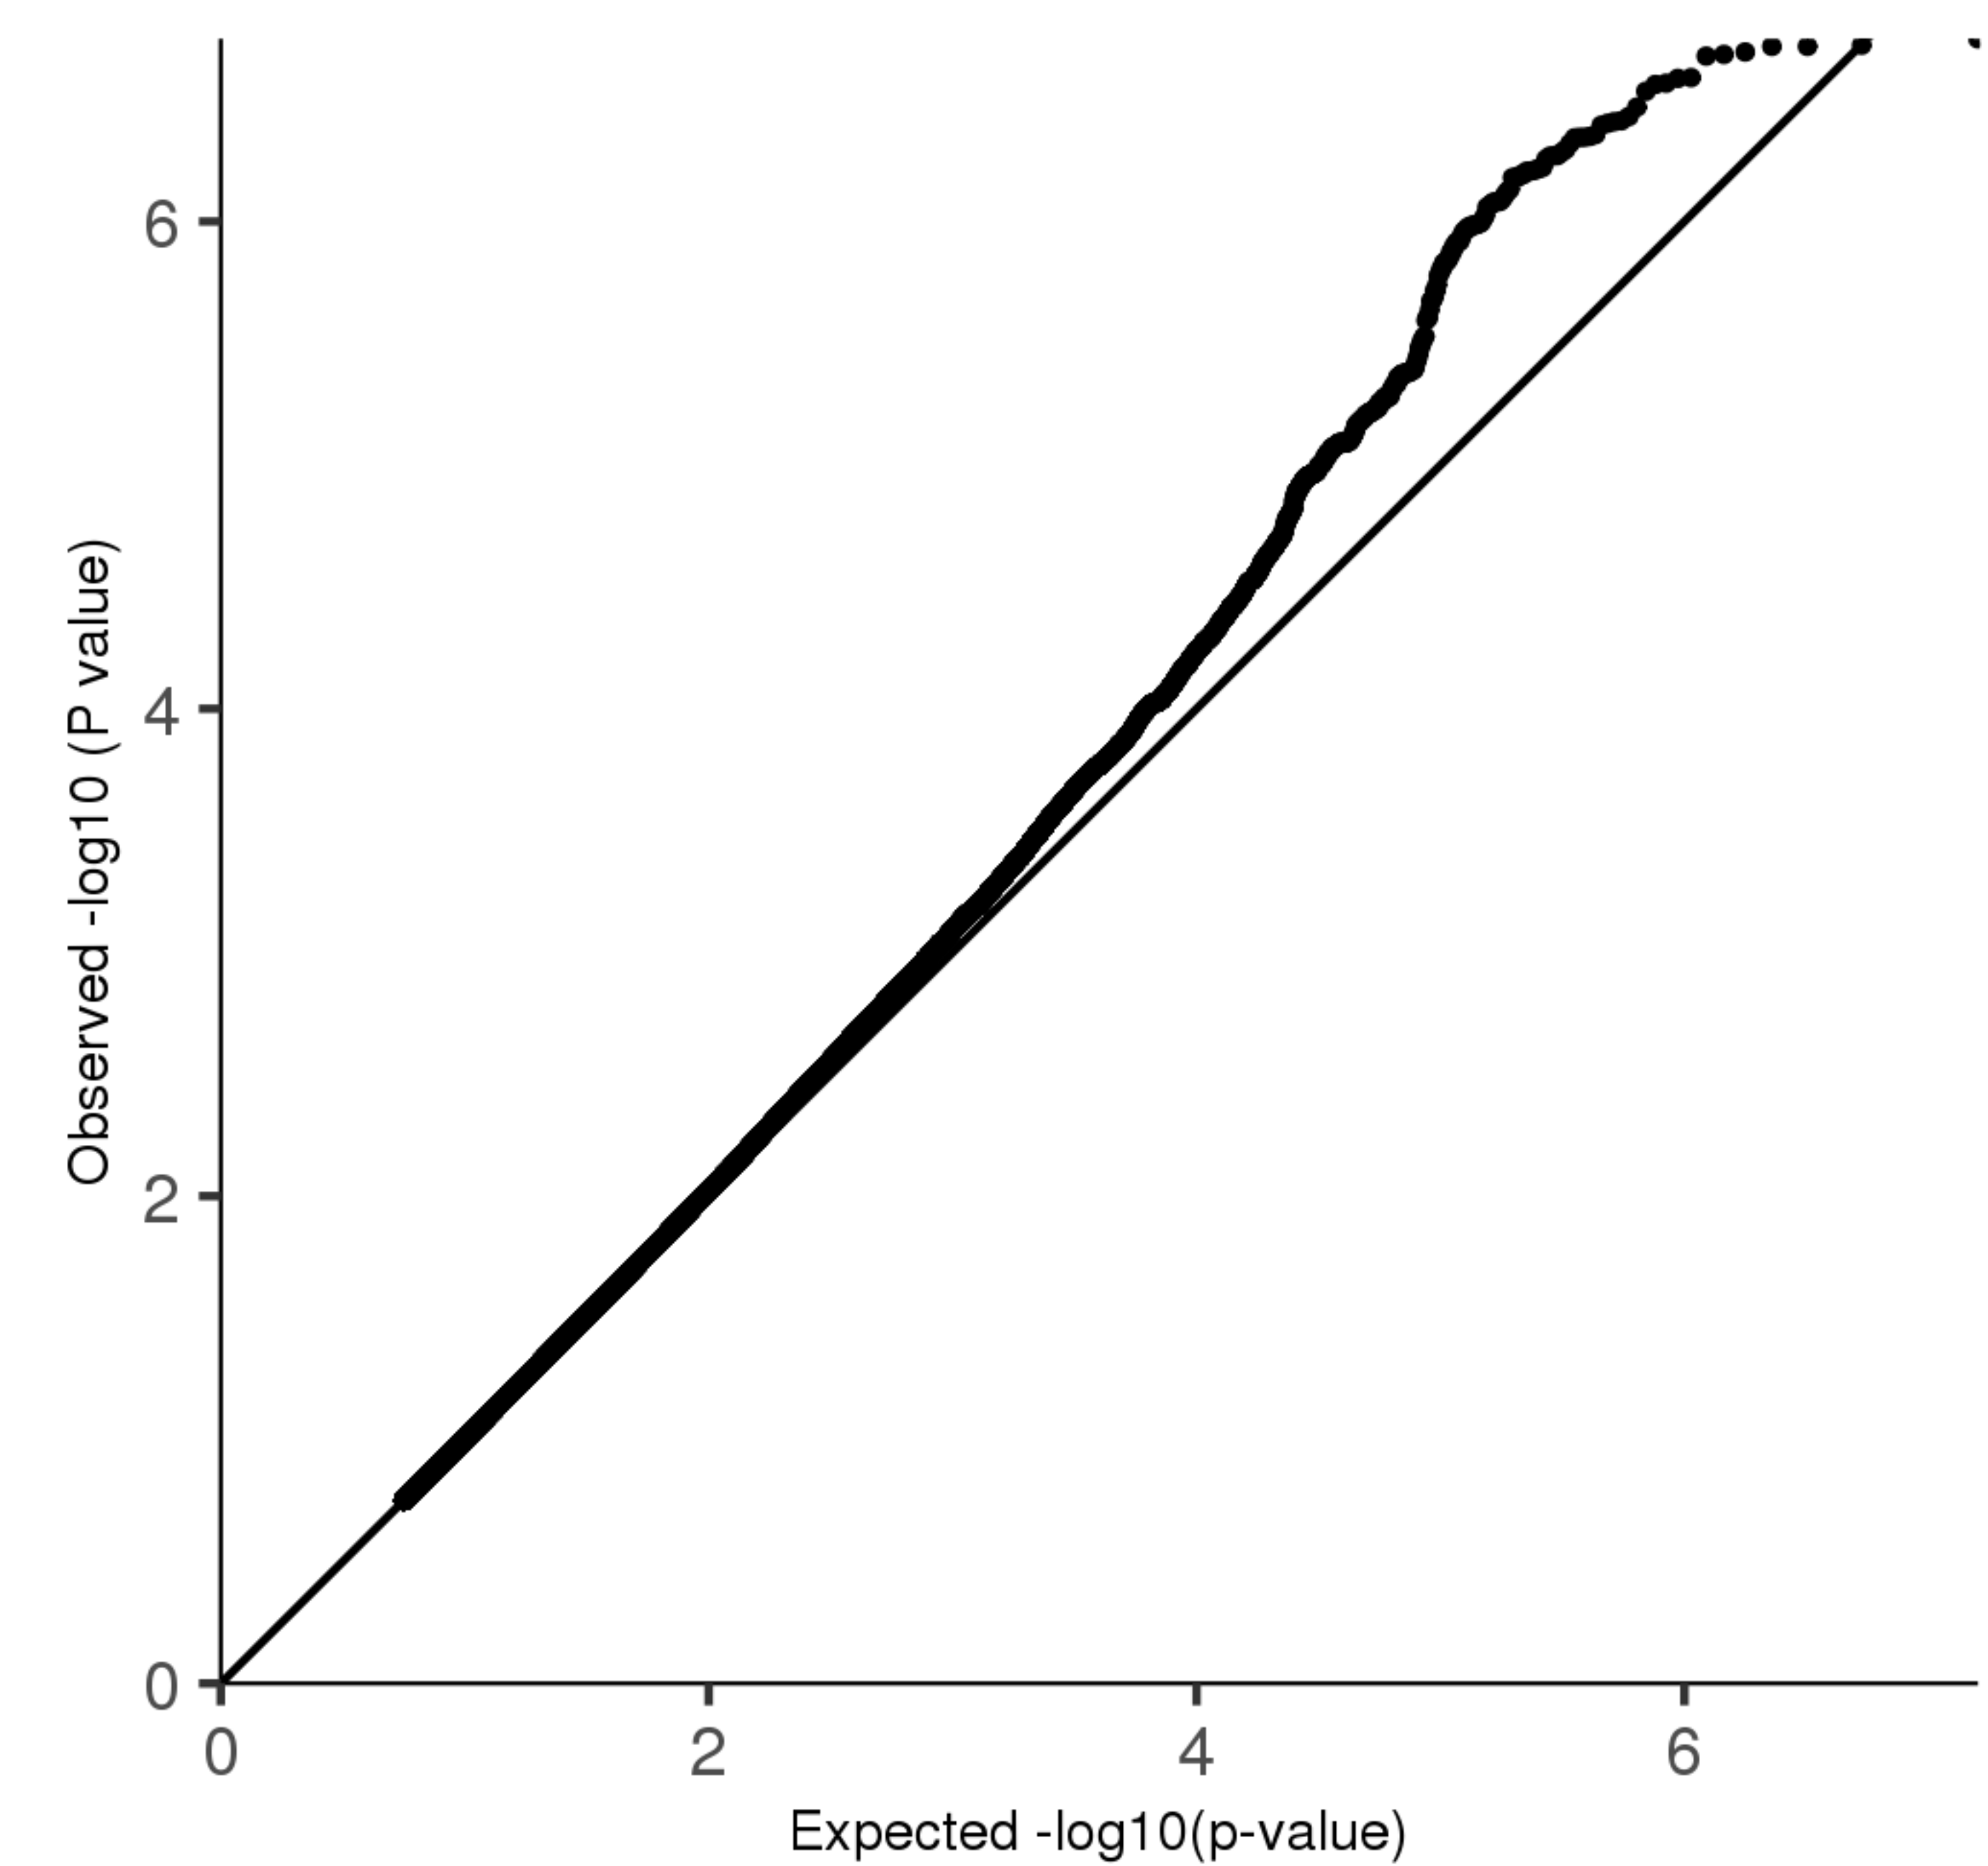



Second Bone PC

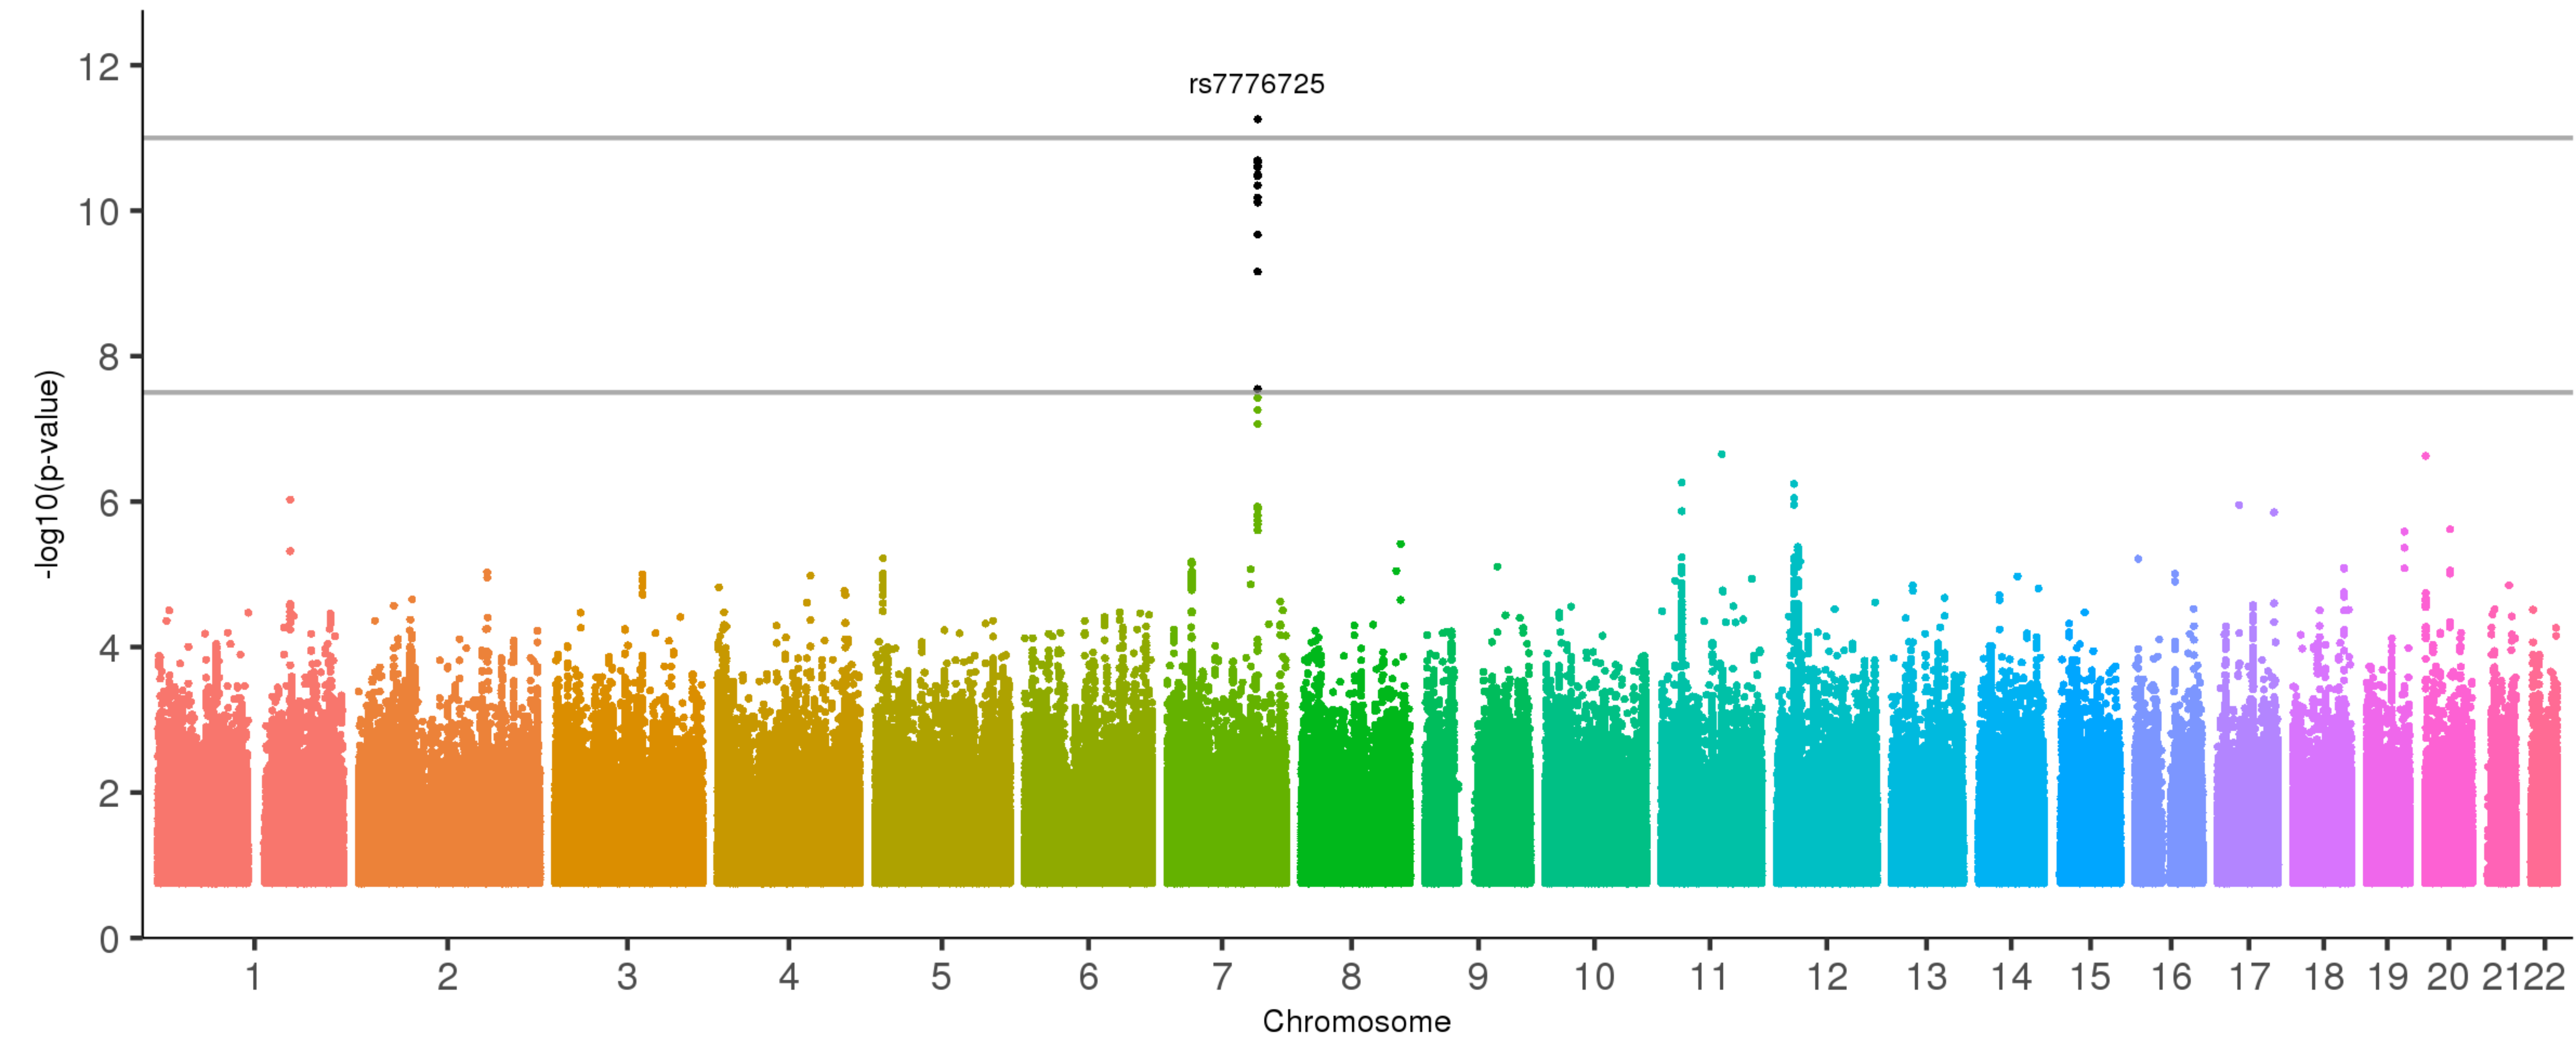

Second Bone PC

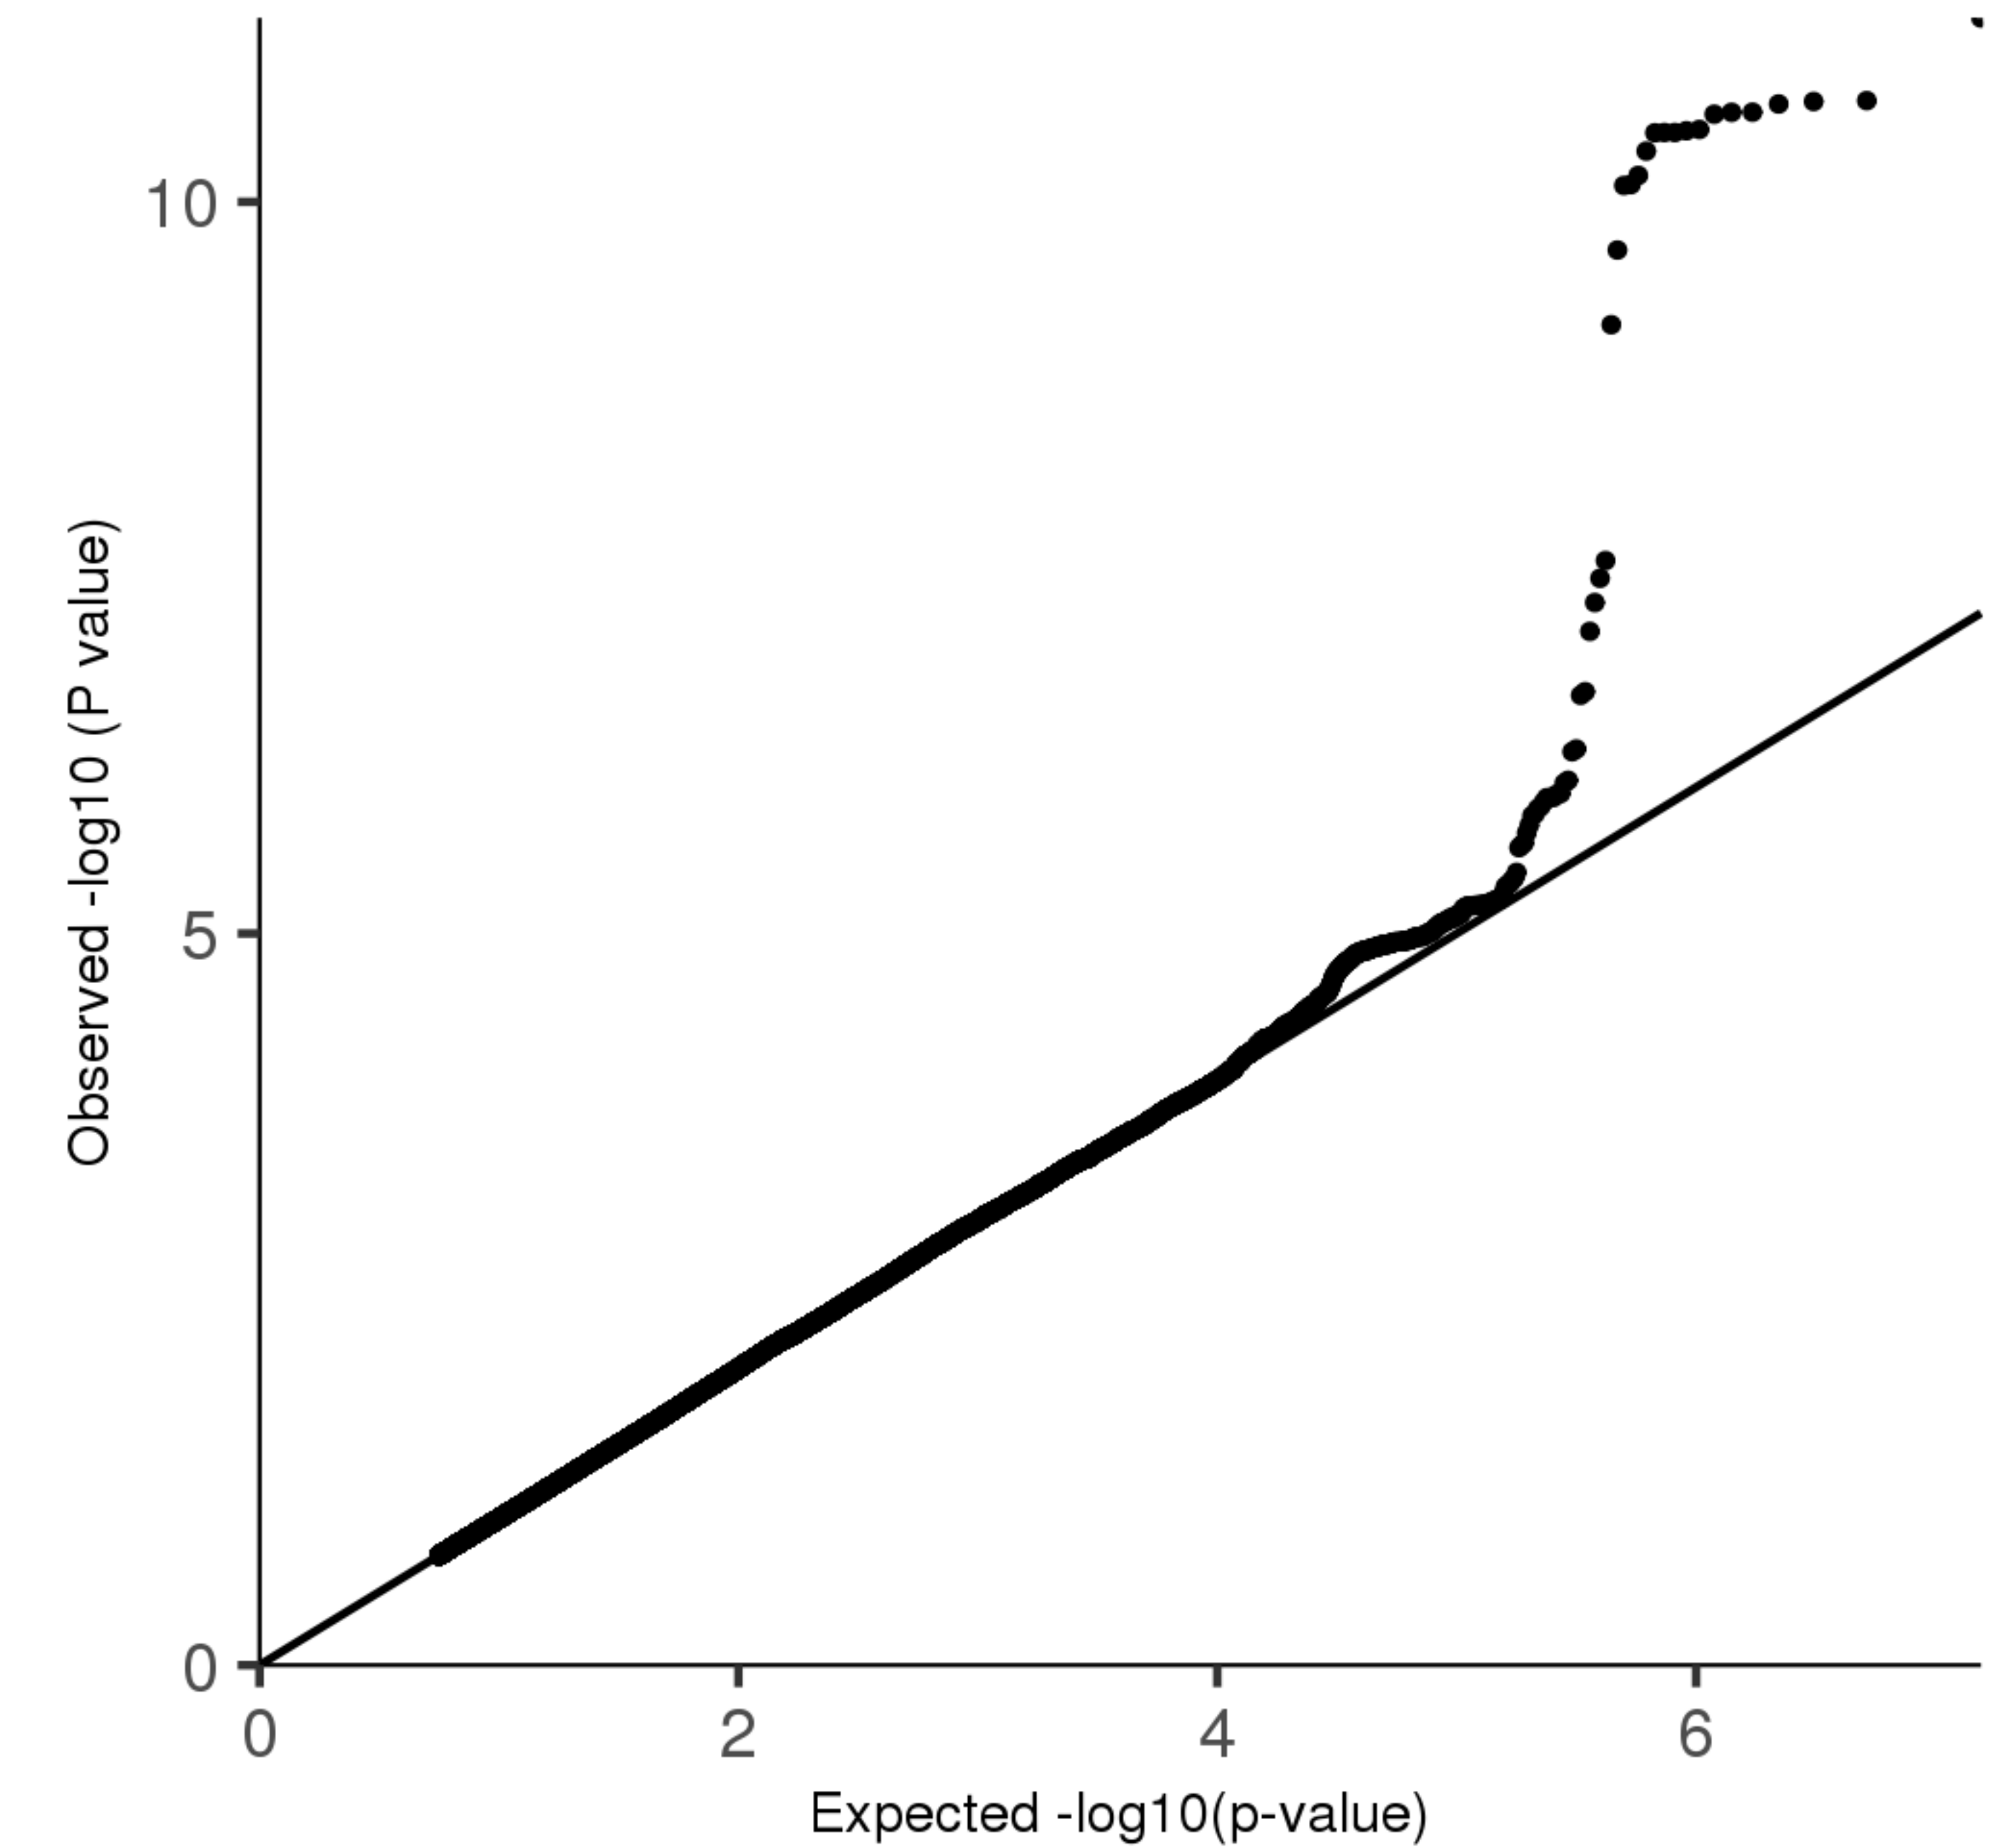

Supplement: Supplementary file [file 178806-22.pdf]
